# Supplementary material for: Endoscopic pyloromyotomy for the treatment of severe and refractory gastroparesis: a pilot, randomised, sham-controlled trial
Source: HighWire-hosted journal article supplement (doi:10.1136/gutjnl-2022-326904), 2022-04-25
Supplement: gutjnl-2022-326904supp001_data_supplement.pdf [file gutjnl-2022-326904supp001_data_supplement.pdf]

**ENDOSCOPIC PYLOROMYOTOMY FOR THE TREATMENT OF SEVERE AND REFRACTORY  
GASTROPARESIS: A PILOT, RANDOMIZED, SHAM-CONTROLLED TRIAL**

Martinek Jan, Hustak Rastislav, Mares Jan, Vackova Zuzana, Spicak  
Julius, Kieslichova Eva, Buncova Marie, Pohl Daniel, Amin Sunil, Tack  
Jan

**Supplementary Appendix**

| <b>Suppl Table S1. Table of contents</b>                                                                              |             |
|-----------------------------------------------------------------------------------------------------------------------|-------------|
| <b>Subject</b>                                                                                                        | <b>PAGE</b> |
| <b>Cover page</b>                                                                                                     | <b>1</b>    |
| <b>Table of content (Suppl. Table S1)</b>                                                                             | <b>2-3</b>  |
| <b>Supplementary tables</b>                                                                                           |             |
| <b>List of Contributors (Suppl. Table S2)</b>                                                                         | <b>4</b>    |
| <b>Authors contribution (Suppl. Table S3)</b>                                                                         | <b>5</b>    |
| Suppl Table S4a. Study design for patients in the active (G-POEM) group                                               | 6           |
| Suppl Table S4b. Study design for patients randomized in the sham group                                               | 7           |
| Suppl Table S5. Gastroparesis Cardinal Symptom Index (GCSI)                                                           | 8           |
| Suppl Table S6a. Inclusion criteria                                                                                   | 9           |
| Suppl Table S6b. Exclusion criteria                                                                                   | 10          |
| Suppl Table S7. Gastric emptying study protocol                                                                       | 11          |
| Suppl Table S8. Pyloric distensibility (Endoflip) measurement protocol                                                | 12          |
| Suppl Table S9. PAGI-SYM score (Patient Assessment of Gastrointestinal Disorders Symptom Severity Index)              | 13          |
| Suppl Table S10. PAGI - Quality of Life (QoL) questionnaire                                                           | 14-15       |
| Suppl. Table S11. Detailed description of the statistical analysis                                                    | 16-18       |
| Suppl Table S12. Patients treated by a respective Trial Center (in and out of the study), Number of Monitoring Visits | 19          |
| Suppl Table S13. Screened and excluded (not enrolled) patients                                                        | 20          |
| Suppl Table S14. Definition of Adverse event (AE) / Serious Adverse Event (SAE)                                       | 21          |
| Suppl Table S15. Overall incidence of adverse events (AE)                                                             | 22-23       |
| Suppl Table S16. Summary of adverse events (AE)                                                                       | 24          |
| Suppl Table S17. Need for analgesics administration on POD 0-1 after G-POEM, sham procedure or cross-over G-POEM      | 25          |
| Suppl Table S18. Procedure details                                                                                    | 26          |
| Suppl Table S19. Treatment success for the primary outcome, sensitivity analysis and etiology subgroups               | 27          |
| Suppl Table S20. Evolution of variables in time                                                                       | 28-29       |
| Suppl Table S21. Evolution of GCSI sub-scores in time                                                                 | 30          |
| Suppl Table S22. Endoflip measurements – primary G-POEM and cross-over G-POEM Combined                                | 31          |
| Suppl Table S23. List of Pre-specified Primary and Secondary and Post-hoc Endpoints and other analyses with reference | 32          |
| <b>Supplementary figures</b>                                                                                          |             |
| Suppl Figure S1. Study design                                                                                         | 33          |
| Suppl Figure S2a. Measurement of pyloric distensibility                                                               | 34          |
| Suppl Figure S2b. Measurement of pyloric distensibility                                                               | 35          |
| Suppl Figure S3. Treatment success at 6 months after procedure                                                        | 36          |
| Suppl Figure S4. Treatment success 3 months after procedure                                                           | 37          |
| Suppl Figure S5a. Evolution of the GCSI total score                                                                   | 38          |
| Suppl Figure S5b. Changes of the GCSI total score between visits                                                      | 38          |
| Suppl Figure S6. Evolution of the GCSI sub-scores                                                                     | 39          |
| Suppl Figure S7a. Evolution of the PAGI-SYM total score                                                               | 40          |
| Suppl Figure S7b. Changes of the PAGI-SYM total score between visits                                                  | 40          |
| Suppl Figure S8a. Evolution of the PAGI-QoL total score                                                               | 41          |
| Suppl Figure S8b. Changes of the PAGI-QoL total score between visits                                                  | 41          |

|                                                                                                    |    |
|----------------------------------------------------------------------------------------------------|----|
| Suppl Figure S9a. Evolution of the GES 4h retention                                                | 42 |
| Suppl Figure S9b. Changes of GES 4h retention between visits                                       | 42 |
| Suppl Figure S10a. Evolution of GES retention halftime                                             | 43 |
| Suppl Figure S10b. Changes of GES retention halftime between visits                                | 43 |
| Suppl Figure S11a. Evolution of Endoflip® measurements for different filling volumes               | 44 |
| Suppl Figure S11b. Changes of Endoflip® measurements for different filling volumes between visits. | 44 |
| Suppl Figure S12. Correlation between GCSI total score and GES 4h retention at three months.       | 45 |
| <b>Financial support</b>                                                                           | 46 |

## SUPPLEMENTARY TABLES

| Suppl Table S2. List of Contributors |                                                                                                          |                         |
|--------------------------------------|----------------------------------------------------------------------------------------------------------|-------------------------|
| Name                                 | Affiliation                                                                                              | City, Country           |
| Jan Martinek                         | Department of Hepatogastroenterology, Institute for Clinical and Experimental Medicine (IKEM)            | Prague, Czech Republic  |
| Rastislav Hustak                     | Department of Internal Medicine, University Hospital Trnava                                              | Trnava, Slovak Republic |
| Jan Mares                            | Department of IT and biostatistic, Institute for Clinical and Experimental Medicine (IKEM)               | Prague, Czech Republic  |
| Zuzana Vackova                       | Department of Hepatogastroenterology, Institute for Clinical and Experimental Medicine (IKEM)            | Prague, Czech Republic  |
| Julius Spicak                        | Department of Hepatogastroenterology, Institute for Clinical and Experimental Medicine (IKEM)            | Prague, Czech Republic  |
| Eva Kieslichova                      | Department of Anesthesiology and Intensive Care, Institute for Clinical and Experimental Medicine (IKEM) | Prague, Czech Republic  |
| Marie Buncova                        | Department of Nuclear Medicine, Institute for Clinical and Experimental Medicine (IKEM)                  | Prague, Czech Republic  |
| Daniel Pohl                          | Division of Gastroenterology and Hepatology, University Hospital Zurich                                  | Zurich, Switzerland     |
| Amin Sunil                           | Division of Digestive Health and Liver Diseases, University of Miami Miller School of Medicine           | Miami, Florida, USA     |
| Jan Tack                             | Department of Gastroenterology and Hepatology, University Hospitals Leuven                               | Leuven, Belgium         |
| Jan Usak                             | Department of Internal Medicine, University Hospital Trnava                                              | Trnava, Slovak Republic |
| Martin Janicko                       | First Department of Internal Medicine, PJ Safarik University                                             | Kosice, Slovak Republic |
| Tereza Malkova                       | Department of Hepatogastroenterology, Institute for Clinical and Experimental Medicine (IKEM)            | Prague, Czech Republic  |
| Monika Horackova                     | Department of Hepatogastroenterology, Institute for Clinical and Experimental Medicine (IKEM)            | Prague, Czech Republic  |
| Helena Pitelkova                     | Department of Hepatogastroenterology, Institute for Clinical and Experimental Medicine (IKEM)            | Prague, Czech Republic  |
| Adela Kreckova                       | Department of Hepatogastroenterology, Institute for Clinical and Experimental Medicine (IKEM)            | Prague, Czech Republic  |
| Gabriela Petranova                   | Axon CRO Ltd.                                                                                            | Prague, Czech Republic  |
| Emilia Oleksakova                    | Department of Internal Medicine, University Hospital Trnava                                              | Trnava, Slovak Republic |
| Eva Kolarovicova                     | Department of Internal Medicine, University Hospital Trnava                                              | Trnava, Slovak Republic |

**Suppl Table S3. Authors contribution**

|                    |                                                                                                                                                               |
|--------------------|---------------------------------------------------------------------------------------------------------------------------------------------------------------|
| Jan Martinek       | study concept and study design, patient's recruitment, performing all G-POEM procedures, follow-up endoscopies, drafting the manuscript                       |
| Rastislav Hustak   | study design, data collection, assisting the procedures, follow-up endoscopies, drafting the manuscript                                                       |
| Jan Mares          | statistical analysis, study design, drafting the manuscript                                                                                                   |
| Zuzana Vackova     | patient's recruitment and selection, measurement and analysis of pyloric distensibility measurement, follow-up endoscopies, critical review of the manuscript |
| Julius Spicak      | follow-up endoscopies, critical review of the manuscript                                                                                                      |
| Eva Kieslichova    | anesthesia during procedures, analysis of AEs, critical review of the manuscript                                                                              |
| Marie Buncova      | gastric emptying studies - analysis and critical review of the manuscript                                                                                     |
| Daniel Pohl        | Endoflip measurement and analysis, study design                                                                                                               |
| Sunil Amin         | critical review of the manuscript, language corrections                                                                                                       |
| Jan Tack           | study concept, study design, data analysis and interpretation, critical review of the manuscript                                                              |
| Jan Usak           | patient's recruitment and selection                                                                                                                           |
| Martin Janicko     | statistical advisor, study design                                                                                                                             |
| Tereza Malkova     | endoscopic nurse, assisting the procedures                                                                                                                    |
| Monika Horackova   | head nurse, post-operative care, follow-up visits                                                                                                             |
| Helena Pitelkova   | head nurse, post-operative care, follow-up visits                                                                                                             |
| Adela Kreckova     | Study administration, CRFs - data collection                                                                                                                  |
| Gabriela Petranova | study monitoring (Axon CRO Ltd.)                                                                                                                              |
| Emilia Oleksakova  | endoscopic nurse, assisting the procedures                                                                                                                    |
| Eva Kolarovicova   | study nurse, postoperative care, follow-up visits                                                                                                             |

| <b>Suppl Table S4a. Study design for patients in the active (G-POEM) group</b> |                 |                                         |                 |           |           |                 |            |                 |
|--------------------------------------------------------------------------------|-----------------|-----------------------------------------|-----------------|-----------|-----------|-----------------|------------|-----------------|
|                                                                                | <i>Baseline</i> | <i>POD 0 – day<br/>of G-POEM</i>        | <i>POD 1</i>    | <i>3M</i> | <i>6M</i> | <i>12M</i>      | <i>24M</i> | <i>36M</i>      |
| <i>Scintigraphy</i>                                                            | ✓               |                                         |                 | ✓         | -         | ✓               |            | ✓<br>(optional) |
| <i>Endoscopy</i>                                                               | ✓               | ✓                                       | ✓<br>(optional) | ✓         | -         | ✓<br>(optional) |            |                 |
| <i>GCSI + PAGI-SYM +<br/>PAGI-QoL</i>                                          | ✓               |                                         |                 | ✓         | ✓         | ✓               | ✓          | ✓               |
| <i>Blood tests</i>                                                             | ✓               |                                         | ✓               |           |           |                 |            |                 |
| <i>Endoflip</i>                                                                |                 | ✓<br><i>Before and after<br/>G-POEM</i> |                 | ✓         |           |                 |            |                 |

GCSI = Gastroparesis Cardinal Symptom Index (see also suppl table S5)

PAGI-SYM = Patient Assessment of Upper Gastrointestinal Symptom Severity Index (see also suppl table S9)

PAGI QoL = Patient Assessment of Upper Gastrointestinal Disorders-Quality of Life (see also suppl table S10)

POD = postoperative day

3M, 6M, 12M, 24M, 36M = 3 months, 6 months, 12 months, 24 months, and 36 months visit

| Suppl Table S4b. Study design for patients randomized in the sham group* |          |               |                 |     |     |                   |                 |    |    |                 |     |                 |
|--------------------------------------------------------------------------|----------|---------------|-----------------|-----|-----|-------------------|-----------------|----|----|-----------------|-----|-----------------|
|                                                                          | Baseline | POD 0         | POD 1           | 3M  | 6M* | POD 0/ G-POEM     | POD1            | 3M | 6M | 12M             | 24M | 36M             |
| Scintigraphy                                                             | ✓        |               |                 | ✓   | -   |                   |                 | ✓  |    |                 |     | ✓<br>(optional) |
| Endoscopy                                                                | ✓        | ✓             | ✓<br>(optional) | ✓   | -   |                   | ✓<br>(optional) | ✓  |    | ✓<br>(optional) |     |                 |
| GCSI + PAGI-SYM,<br>PAGI-QoL                                             | ✓        |               |                 | ✓   | ✓   |                   |                 | ✓  | ✓  | ✓               | ✓   | ✓               |
| Blood tests                                                              | ✓        |               | ✓               |     |     |                   | ✓               |    |    |                 |     |                 |
| Endoflip                                                                 |          | ✓<br>Before** |                 | ✓ ♦ |     | ✓<br>After G-POEM |                 | ✓  |    |                 |     |                 |

\* At 6 months, the patients will be offered cross-over G-POEM (if symptoms persist).

\*\* In patients having undergone Endoflip during the sham procedure, no Endoflip measurement will be repeated prior to G-POEM.

♦ sham measurement

GCSI = Gastroparesis Cardinal Symptom Index (see also suppl table S5)

PAGI-SYM = Patient Assessment of Upper Gastrointestinal Symptom Severity Index (see also suppl table S9)

PAGI QoL = Patient Assessment of Upper Gastrointestinal Disorders-Quality of Life (see also suppl table S10)

POD = postoperative day

3M, 6M, 12M, 24M, 36M = 3 months, 6 months, 12 months, 24 months, and 36 months visit

**Suppl Table S5. Gastroparesis Cardinal Symptom Index (GCSI)**

|   | Symptoms                               | Score |           |      |          |        |             |
|---|----------------------------------------|-------|-----------|------|----------|--------|-------------|
|   |                                        | 0     | 1         | 2    | 3        | 4      | 5           |
| 1 | Nausea                                 | None  | Very mild | Mild | Moderate | Severe | Very severe |
| 2 | Retching                               | None  | Very mild | Mild | Moderate | Severe | Very severe |
| 3 | Vomiting                               | None  | Very mild | Mild | Moderate | Severe | Very severe |
| 4 | Stomach fullness                       | None  | Very mild | Mild | Moderate | Severe | Very severe |
| 5 | Not able to finish a normal sized meal | None  | Very mild | Mild | Moderate | Severe | Very severe |
| 6 | Feeling extensively full after meals   | None  | Very mild | Mild | Moderate | Severe | Very severe |
| 7 | Loss of appetite                       | None  | Very mild | Mild | Moderate | Severe | Very severe |
| 8 | Bloating                               | None  | Very mild | Mild | Moderate | Severe | Very severe |
| 9 | Stomach or belly visibly larger        | None  | Very mild | Mild | Moderate | Severe | Very severe |

The GCSI consists of nine items and three subscales to measure symptoms related to gastroparesis. The nausea/vomiting subscale consists of the following three items: nausea, retching, and vomiting. The postprandial fullness/early satiety subscale consists of the following four items: stomach fullness, inability to finish a normal-sized meal, feeling excessively full after meals, and loss of appetite. The bloating subscale consists of the following items: bloating and stomach or belly visibly larger. The GCSI total score is constructed as the average of the three symptom subscales. Its value ranges from zero meaning no symptoms to five indicating maximally severe symptomatology (see ref. No. 18-19 in the main article).

**Calculation:**

Total GCSI score = arithmetic mean of the three symptom subscales. Subscores = arithmetic means of (1-3), (4-7) and (8-9)



**Suppl Table S6a. Inclusion criteria**

|   |                                                                                                                                                                                                                                                                                                                                                                                                                                                                                                                                                                                                                                                                                                                                                                                                                                                                                                                                                                                                                                                                                                                                        |
|---|----------------------------------------------------------------------------------------------------------------------------------------------------------------------------------------------------------------------------------------------------------------------------------------------------------------------------------------------------------------------------------------------------------------------------------------------------------------------------------------------------------------------------------------------------------------------------------------------------------------------------------------------------------------------------------------------------------------------------------------------------------------------------------------------------------------------------------------------------------------------------------------------------------------------------------------------------------------------------------------------------------------------------------------------------------------------------------------------------------------------------------------|
| 1 | <p><b>Refractory</b> (&gt; 6 months) and severe (based on a validated total GCSI = Gastroparesis Cardinal Symptom Index) gastroparesis, with confirmed gastric emptying based on a gastric emptying study: standardized protocol of <b>scintigraphy in all patients</b> (performed less than 6 months prior to enrolment (see ref. No. 13 in the main article), or confirmed by a <b>validated gastric emptying breath test</b> The total GCSI score must be &gt;2.3.</p> <ul style="list-style-type: none"> <li>• Abnormal gastric emptying is defined as retention of Tc-99 m &gt;60% at 2 h and/or ≥10% of residual activity at 4 h on a standardized sulphur colloid solid-phase gastric emptying study.</li> <li>• Radiolabelled liquids emptying study will be reserved as alternative technique for patients with poor tolerance of solids during scintigraphy. Abnormal gastric emptying will represent &gt;50% retention of radiolabelled content (e.g. In-111) at 1 hour.</li> <li>• Abnormal gastric emptying breath test based on a solid or malrange determination for the test used (e.g. T1/2 &gt; 109 min).</li> </ul> |
| 2 | Severe refractory disease is defined as GCSI >2.3 and failure or recurrence in patients who received available optimal pharmacological therapies.                                                                                                                                                                                                                                                                                                                                                                                                                                                                                                                                                                                                                                                                                                                                                                                                                                                                                                                                                                                      |
| 3 | Persons 18 years or older at the time of signing the informed consent                                                                                                                                                                                                                                                                                                                                                                                                                                                                                                                                                                                                                                                                                                                                                                                                                                                                                                                                                                                                                                                                  |
| 4 | Signed informed consent                                                                                                                                                                                                                                                                                                                                                                                                                                                                                                                                                                                                                                                                                                                                                                                                                                                                                                                                                                                                                                                                                                                |

| Suppl Table S6b. Exclusion criteria |                                                                                                                                                                             |
|-------------------------------------|-----------------------------------------------------------------------------------------------------------------------------------------------------------------------------|
| 1                                   | No previous attempt with at least one prokinetic drug                                                                                                                       |
| 2                                   | No previous attempt to withdraw anticholinergic agents and glucagon like peptide - 1 (GLP-1) and amylin analogues* in patients treated with these substances (see ref. 1-2) |
| 3                                   | Active treatment with opioids or a history of treatment with opioids within 12 months before enrolment                                                                      |
| 4                                   | Previous gastric surgery BI or II, esophagectomy, gastric pull-through                                                                                                      |
| 5                                   | Previous pyloromyotomy or pyloroplasty                                                                                                                                      |
| 6                                   | Known eosinophilic gastroenteritis                                                                                                                                          |
| 7                                   | Organic pyloric (or intestinal) obstruction (fibrotic stricture, etc.)                                                                                                      |
| 8                                   | Sever coagulopathy                                                                                                                                                          |
| 9                                   | Esophageal or gastric varices and /or portal gastropathy                                                                                                                    |
| 10                                  | Advanced liver cirrhosis (Child B or Child C)                                                                                                                               |
| 11                                  | Active peptic ulcer disease                                                                                                                                                 |
| 12                                  | Pregnancy or puerperium                                                                                                                                                     |
| 13                                  | Malignant or pre-malignant gastric diseases (dysplasia, gastric cancer, GIST): patients with a history of such disease after its cure are eligible for enrolment            |
| 14                                  | Any other condition, which in the opinion of the investigator would interfere with study requirements                                                                       |
| 15                                  | Uncontrolled diabetes mellitus                                                                                                                                              |
| 16                                  | Diagnosis of rumination syndrome or “eating” disorder (mental anorexia, bulimia nervosa) **                                                                                 |
| 17                                  | Severe constipation without using laxatives                                                                                                                                 |
| 18                                  | Inability to obtain informed consent                                                                                                                                        |

\* Attempts to normalize glycaemic control using amylin analogues (e.g., pramlintide) or GLP-1 analogues (e.g., exenatide) may result in delayed gastric emptying.

\*\* The presence of a rumination syndrome or eating disorders (anorexia nervosa, bulimia) is an exclusion criterion. In case of doubts, a psychiatric examination should be performed

GIST = Gastrointestinal Stromal Tumor

**Suppl Table S7. Gastric emptying study protocol (GES)**

Scintigraphy protocol in all patients (see ref. No. 15 in the main article, protocol endorsed by both American Neurogastroenterology and Motility Society and American Nuclear Medicine Society; 2008); less than 6 months prior to randomization. Test begun with patients under fasting conditions for a minimum of 6 hours. A radiolabelled meal was prepared by adding 0.75 mCi  $^{99m}\text{Tc}$ -sulfur colloid into 2 the liquid egg whites. Eggs were cooked in a microwave or on a hot non-stick skillet, the eggs were stirred once or twice during cooking until firm – to the consistency of an omelette. Then, the bread was toasted and jelly spread on the toasted bread.

- Gamma camera images was obtained immediately after meal ingestion and then at 1, 2, 3 and 4 hours. The geometric mean of delay-corrected counts was used to estimate the proportion of  $^{99m}\text{Tc}$  emptied at each time point. Diagnostic criterion for gastroparesis is defined as the percentage of gastric retention >60% at 2 h and equal to or greater than 10% at 4 h or both. Half-time (T1/2) emptying time was also be calculated. In case of poor tolerance of solids during gastric scintigraphy, radiolabelled liquids were used (see inclusion criteria, suppl table S6a). At least 72 hours before gastric emptying test, narcotics and other medications that can delay gastric emptying should be discontinued. Other alternative meals were used for patients with egg allergies or egg's intolerance, patients with gluten-sensitive enteropathy, according to the local principles.
- Items needed for Egg Beaters Gastric Emptying Scintigraphy: 118 mL of liquid egg whites (Egg Beaters; egg substitute): 99% real eggs, cholesterol free, fat free, low calorie (120 g Egg Beater, 60 kcal, approx. two large eggs), 2 slices of wheat bread (120 kcal), Strawberry jam (30 g, 74 kcal), Water (120 mL), Technetium-99m 0.75 mCi. The subject completed the sandwich meal quickly, within max. 10 minutes. Generally, the fasting glucose in diabetic patients should be between 75 and 275 mg/dL (4.2 to 15.3 mmol/l). Diabetic patients administered their insulin with meal ingestion, generally  $\frac{1}{2}$  what they took normally. The nutritional composition of the meal was 69-72% carbohydrate, 22-24% protein, 2% fat and 2% fibre.

**Suppl Table S8. Pyloric distensibility (Endoflip®) measurement protocol**See also **Figures S2a** and **S2b** (see ref. No. 16, 17)

The pyloric distensibility measurement was performed using the Endoflip™ 1.0 Impedance Planimetry System (Medtronic, Minneapolis, MN, USA). The Endoflip system consists of a 24 cm long 3mm outer diameter catheter with highly compliant balloon attached to its tip surrounding 16 paired impedance sensors mounted on the catheter and a solid-state pressure transducer on the distal end of the catheter within the balloon.

A single-use catheter EF-325N with 8 cm long balloon was used for all measurements. The catheter was attached to both the monitor and a syringe automatically filling the balloon with conductive fluid. Based on the principle of impedance planimetry, excitation electrodes at either end of the balloon emit a continuous low electric current, the voltage is measured across the paired impedance planimetry electrodes by leveraging Ohm's law to provide measurement of cross-sectional area at intervals based on electrode spacing. Cross-sectional area together with the pressure data from the intra-balloon pressure transducer allow to calculate resistance to distention, i.e. distensibility.

The catheter was introduced into the pylorus under direct endoscopic control, a snare or forceps were used to navigate the catheter through the pylorus if necessary. Once adequate position was achieved, with the balloon straddling the pylorus (an hourglass shape image on the Endoflip monitor), the balloon was automatically (but under direct visual supervision of the performing physician) filled with fluid from an 80mL syringe to three balloon filling volumes 30 mL, 40 mL, 50 mL. At each of these volumes the following parameters were recorded: distensibility index (mm<sup>2</sup>/mmHg), cross-sectional area (mm<sup>2</sup>), balloon diameter (mm), and intra-balloon pressure (mmHg). The measurements were performed in between the peristaltic waves driven by the motor migrating complex. The additional time to the procedure was approximately 10 minutes.

| <b>Suppl Table S9. PAGI-SYM score (Patient Assessment of Gastrointestinal Disorders Symptom Severity Index)</b> |                                                                                                        |           |      |          |        |             |
|-----------------------------------------------------------------------------------------------------------------|--------------------------------------------------------------------------------------------------------|-----------|------|----------|--------|-------------|
| Symptoms                                                                                                        | Score                                                                                                  |           |      |          |        |             |
|                                                                                                                 | 0                                                                                                      | 1         | 2    | 3        | 4      | 5           |
|                                                                                                                 | None                                                                                                   | Very mild | Mild | Modarate | Severe | Very severe |
| 1                                                                                                               | Heartburn (burning pain rising in your chest or throat) during the day                                 |           |      |          |        |             |
| 2                                                                                                               | Regurgitation or reflux (fluid or liquid from your stomach coming up into your throat) during the day  |           |      |          |        |             |
| 3                                                                                                               | Heartburn (burning pain rising in your chest or throat) when lying down                                |           |      |          |        |             |
| 4                                                                                                               | Regurgitation or reflux (fluid or liquid from your stomach coming up into your throat) when lying down |           |      |          |        |             |
| 5                                                                                                               | Feeling of discomfort inside your chest during the day                                                 |           |      |          |        |             |
| 6                                                                                                               | Bitter, acid or sour taste in your mouth                                                               |           |      |          |        |             |
| 7                                                                                                               | Feeling of discomfort inside your chest at night (during sleep time)                                   |           |      |          |        |             |
| 8                                                                                                               | Vomiting                                                                                               |           |      |          |        |             |
| 9                                                                                                               | Nausea (feeling sick to your stomach as if you were going to vomit or throw up)                        |           |      |          |        |             |
| 10                                                                                                              | Retching (heaving as if to vomit, but nothing comes up)                                                |           |      |          |        |             |
| 11                                                                                                              | Stomach fullness                                                                                       |           |      |          |        |             |
| 12                                                                                                              | Not able to finish a normal-sized meal                                                                 |           |      |          |        |             |
| 13                                                                                                              | Feeling excessively full after meals                                                                   |           |      |          |        |             |
| 14                                                                                                              | Loss of appetite                                                                                       |           |      |          |        |             |
| 15                                                                                                              | Bloating (feeling like you need to loosen your clothes)                                                |           |      |          |        |             |
| 16                                                                                                              | Stomach or belly visibly larger                                                                        |           |      |          |        |             |
| 17                                                                                                              | Upper abdominal (above the navel) discomfort                                                           |           |      |          |        |             |
| 18                                                                                                              | Upper abdominal (above the navel) pain                                                                 |           |      |          |        |             |
| 19                                                                                                              | Lower abdominal (below the navel) pain                                                                 |           |      |          |        |             |
| 20                                                                                                              | Lower abdominal (below navel) discomfort                                                               |           |      |          |        |             |

(see ref. No. 20 in the main article)

Questionnaire was developed to measure specific symptoms of patients with upper gastrointestinal disorders. It records 20 symptoms (6 subscales) and assesses their severity within the 2 weeks prior to the test. Subscale scores are calculated by averaging across items comprising the subscale; scores vary from 0 (none or absent) to 5 (very severe). The PAGI-SYM subscale scores have good internal consistency and test-retest reliability (18).

1 - 7 = heartburn/regurgitation

8 - 10 = nausea/vomiting

11 - 14 = post-prandial fullness/early satiety

15 - 16 = bloating

17 - 18 = upper abdominal pain

19 - 20 = lower abdominal pain

#### **Calculation:**

Total PAGY-SIM score = arithmetic mean of the six symptom subscales. Subscores = arithmetic means of (1-7), (8-10), (11-14), (15-16), (17-18) and (19-20)

**Suppl Table S10. PAGA – QoL questionnaire (Patient Assessment of Upper Gastrointestinal Disorders – Quality of Life)**

Questions mostly related to previous 2 weeks.

Most desirable option: 5 points / Less desirable option: 0 points

| Symptoms                                                                          | Score                                                                                               |                      |                  |                        |                  |                 |
|-----------------------------------------------------------------------------------|-----------------------------------------------------------------------------------------------------|----------------------|------------------|------------------------|------------------|-----------------|
|                                                                                   | 0                                                                                                   | 1                    | 2                | 3                      | 4                | 5               |
|                                                                                   | None of the time                                                                                    | A little of the time | Some of the time | A good bit of the time | Most of the time | All of the time |
| During the past 2 weeks, because of your Gastrointestinal problems, how often ... |                                                                                                     |                      |                  |                        |                  |                 |
| 1                                                                                 | have you had to depend on others to do your daily activities?                                       |                      |                  |                        |                  |                 |
| 2                                                                                 | have you avoided performing your daily activities?                                                  |                      |                  |                        |                  |                 |
| 3                                                                                 | have you had difficulty concentrating?                                                              |                      |                  |                        |                  |                 |
| 4                                                                                 | has it taken you longer than usual to perform your daily activities?                                |                      |                  |                        |                  |                 |
| 5                                                                                 | have you felt tired?                                                                                |                      |                  |                        |                  |                 |
| 6                                                                                 | have you lost the desire to participate in social activities such as visiting friends or relatives? |                      |                  |                        |                  |                 |
| 7                                                                                 | have you been worried about having stomach symptoms in public?                                      |                      |                  |                        |                  |                 |
| 8                                                                                 | have you avoided performing physical activities or sports?                                          |                      |                  |                        |                  |                 |
| 9                                                                                 | have you avoided traveling?                                                                         |                      |                  |                        |                  |                 |
| 10                                                                                | have you felt frustrated about not being able to do what you wanted to do?                          |                      |                  |                        |                  |                 |
| 11                                                                                | have you felt constricted in the clothes you wear?                                                  |                      |                  |                        |                  |                 |
| 12                                                                                | have you felt frustrated about not being able to dress as you wanted to?                            |                      |                  |                        |                  |                 |
| 13                                                                                | have you felt concerned about what you can and cannot eat?                                          |                      |                  |                        |                  |                 |
| 14                                                                                | have you avoided certain types of foods?                                                            |                      |                  |                        |                  |                 |
| 15                                                                                | have you restricted eating at restaurant or at someone's home?                                      |                      |                  |                        |                  |                 |
| 16                                                                                | have you felt less enjoyment in food than usual?                                                    |                      |                  |                        |                  |                 |
| 17                                                                                | have you felt concerned that a change in your food habits could trigger your symptoms?              |                      |                  |                        |                  |                 |
| 18                                                                                | have you felt frustrated about not being able to choose the food you wanted to?                     |                      |                  |                        |                  |                 |
| 19                                                                                | have you left frustrated about not being able to choose the type of beverage you wanted to?         |                      |                  |                        |                  |                 |
| 20                                                                                | has your relationship with your spouse or partner been disrupted?                                   |                      |                  |                        |                  |                 |
| 21                                                                                | has your relationship with your children or relatives been disrupted?                               |                      |                  |                        |                  |                 |
| 22                                                                                | has your relationship with your friends been disrupted?                                             |                      |                  |                        |                  |                 |
| 23                                                                                | have you been in a bad mood?                                                                        |                      |                  |                        |                  |                 |
| 24                                                                                | have you felt depressed?                                                                            |                      |                  |                        |                  |                 |
| 25                                                                                | have you felt anxious?                                                                              |                      |                  |                        |                  |                 |
| 26                                                                                | have you felt angry?                                                                                |                      |                  |                        |                  |                 |
| 27                                                                                | have you felt irritable?                                                                            |                      |                  |                        |                  |                 |
| 28                                                                                | have you felt discouraged?                                                                          |                      |                  |                        |                  |                 |
| 29                                                                                | have you been stressed?                                                                             |                      |                  |                        |                  |                 |
| 30                                                                                | have you felt helpless?                                                                             |                      |                  |                        |                  |                 |

(see ref. No. 21 in the main article)

The PAGI-QoL contains 30 items with five subscales:

- (1) daily activities (1 – 10)
- (2) clothing (11 – 12)
- (3) diet/food habits (13 – 19)
- (4) relationship (20 – 22)
- (5) psychological well-being and distress (23 – 30)

The PAGI-QoL questionnaire contains of 30 items with five subscales: (1) daily activities; (2) clothing; (3) diet/food habits; (4) relationship; and (5) psychological well-being and distress. Each items are scored on a 6-point Likert scale, with response options ranging from 0 (none) to 5 (severe problem all of the time). Subscale scores are calculated by averaging the item responses.

**Calculation:**

Total PAGI-QoL score = arithmetic mean of the five subscales. Subscores = arithmetic means of (1-10), (11-12), (13-19), (20-22) and (23-30)

**Suppl Table S11. Detailed description of the statistical analysis****The intention to treat population and early study termination**

All the main analyses were performed on the Intention To Treat (ITT) population as specified in the protocol. The ITT population includes all randomized patients and evaluates them as members of the groups to which they were originally allocated regardless of the actual treatment received or any other protocol deviations. Since some values were missing (including a complete follow-up of one patient in the sham group who withdrew consent before receiving any procedure), these values had to be imputed to recover the ITT population. The sample size for all the analyses on ITT is 41 patients as the trial was terminated early for efficacy of G-POEM in a planned interim analysis. As stated in the report of the Data and Safety Monitoring Board, the decision to stop the enrolment was adopted based on a combination of two factors: 1) The interim result was truly highly significant in favor of G-POEM with  $p=0.003$  (the final  $p$ -value for the main outcome presented in the results is different since more follow-up data accumulated after the enrollment was stopped at the interim analysis. Unfortunately, no exact strategy for early termination was indicated in the study protocol. Therefore, the conservative Haybittle-Peto boundary was considered indicating to stop the trial at  $p=0.001$  for any number of interim analyses. This boundary was almost reached. 2) The second factor was the risk of general anesthesia for patients undergoing the sham procedure.

**Imputation of missing data and confidence intervals**

The imputation of missing values was performed by the multiple imputation procedure with chained equations. We only imputed some missing values for the 41 patients enrolled in the study. We did not impute values for the remaining 45 potential patients, who were not enrolled in the study due to the early study termination. Although the amount of missing data was rather low – at most 3 values missing in any of the variables evaluated on the ITT basis – we decided on imputation to adhere to the protocol. The assumption of data missing at random (MAR) was considered plausible and given the low proportion of missing data even its partial violation would not pose a significant threat of biased results. To further prevent any suspicion that our result could be heavily influenced by the imputation, we also provide analysis of treatment success (primary outcome) on the per protocol population (1 patient with technical failure and 1 with missing GCSI excluded) and also the worst case imputation (1 technical failure in the G-POEM group as failure and 1 missing GCSI follow up in sham as success).

**Multiple imputation in simple terms:** The chained equations approach allows imputation of missing values using the information from the observed values. The estimates of missing values are updated iteratively which allows one to deal with missing values in all included variables. The process of imputation is random to some extent. This is further used in the multiple imputation approach. Here, multiple (e.g. 100) different random versions of imputed datasets are created. The desired analysis is performed on each realization of the dataset. Finally, the estimates of desired statistics (e.g. the median) are combined from all the imputations and their confidence intervals are constructed while reflecting variability originating both from the observed data itself and from the uncertainty of the imputation process. The resulting values are an aggregate of all the different realizations of the imputation. As a result, for example the treatment success in the sham group is 22% in 20 patients, so the value does not correspond to any of 4/20 or 5/20. This reflects the fact that the patient with missing follow-up GCSI values was assigned a treatment success in some imputations and treatment failure in the others.



Our imputation model included the following variables: age; gender; etiology of gastroparesis; baseline, 3 months, and 6 months values of total GCSI score, total PAGI-SYM score, and total QOL score; and baseline and 3 months values of 4h GES retention and GES retention halftime. We imputed the GCSI scores. The treatment success of the imputed patient was evaluated afterwards. The allocation of the patient was not used for imputation. Otherwise, the model would be strongly forced to impute high GCSI values for a patient just based on allocation into the sham group. We imputed data for the main part of the analysis separate from the cross-over data.

For the estimation of treatment success, we made 100 imputed datasets and on each used the Wilson method for construction of confidence intervals for proportions. Compared to the normal approximation approach, this method can result in non-symmetrical confidence intervals, which is very relevant for example for the GES halftime with a clearly skewed distribution. To combine the Wilson confidence intervals from all imputation datasets we used the method by Lott and Reiter (see ref. 24), which is particularly designed for this purpose.

As the primary statistics for the continuous variables we used the median since normality of the data was rejected by the Shapiro-Wilk test for at least one dataset among the compared groups and time points for each investigated variable. The confidence intervals were obtained as 2.5 % and 97.5 % quantiles from 20000 bootstrapping iterations. The same approach was used for the correlation coefficient between GCSI and gastric emptying.

**Bootstrapping in simple terms:** Bootstrapping is based on the idea that the distribution of observed values is the best available estimate of the actual distribution for the investigated population. Therefore, we resample the data many times (in our case 20000 times) to estimate confidence intervals for our statistic (e.g. the median). When we have N values in our sample, resampling means randomly choosing N of these values with replacement. We can imagine this as writing each of the values on a paper ticket and putting them into a hat. We randomly draw a ticket N times, but each chosen ticket is returned into the hat before another draw. As a result, the resampled dataset contains certain values multiple times and some other are not present at all. On this dataset we calculate our statistic (the median). We then take the dataset of statistics (medians) from all iterations of the resampling and estimate the confidence interval limits by discarding 2.5 % of the lowest and 2.5 % of the highest values (medians).

In our case, the process of bootstrapping had two additional steps:

1. As the number of observations in our dataset is relatively small, the median can be highly influenced by the middle values since the extreme values have no effect on the median. This can in some cases lead to underestimation of the width of the confidence intervals. We face this issue by smoothing with a Gaussian noise with sigma given by the inter quartile range of the sample divided by the square root of N.
2. We sampled the original dataset including missing values and after resampling we imputed the missing values. With this approach, both variability from the data and from the imputation are reflected in the final confidence interval.

#### **P-values and multiple testing**

As the protocol indicated a regression-based approach for the evaluation of the main outcome, we used logistic regression to calculate the only p-value presented in the manuscript for the only primary outcome (as previously specified in the protocol). All the remaining results are presented as point estimates (medians and hazard ratios) with 95 % confidence intervals with accordance to the CONSORT statement. We hope that this will prevent inadequate interpretations of the results

in terms of the multiple testing problem, which we consider likely to happen if we presented uncorrected p-values for all the other outcomes.

Technically, methods of multiple testing correction could be applied. Nevertheless, there are many strategies with different results. Primarily, the decision of which variables should be included into the analysis (defining the family of tests over which the false positive rate is to be controlled) is of major importance. The multiple testing corrections are suited for situations, where many tests are performed without a pre-defined primary hypothesis or for situations where multiple primary hypotheses are aimed to be tested simultaneously in a single trial.

We are convinced that presenting uncorrected confidence intervals for the secondary outcomes is the best option as they both show the uncertainty of the actual presented value and allow the reader to judge the single-test statistical significance. Whenever a confidence interval for a difference lies entirely below or entirely above zero, this corresponds to a statistically significant decrease or increase. As no correction for multiple testing is applied (as it is a common standard), there is 95% confidence for each individual interval to contain the true value of the population statistic (e.g. the median), but not 95% confidence that all the intervals contain their respective true values. This is presumably understandable to the reader. In contrast, by presenting all the p-values a less statistically experienced reader could be tempted to just interpret any p-value below 5 % as a clear indication of a proven effect.

| <b>Suppl Table S12. Patients treated by a respective Trial Center (in and out of the trial) and Number of Monitoring Visits</b> |                     |                           |                         |                                      |                                                                 |                             |
|---------------------------------------------------------------------------------------------------------------------------------|---------------------|---------------------------|-------------------------|--------------------------------------|-----------------------------------------------------------------|-----------------------------|
| Centre No.                                                                                                                      | Randomized patients | Patients underwent G-POEM | Patients underwent sham | Patients underwent cross-over G-POEM | Patients treated outside the trial during trial period (G-POEM) | Number of monitoring visits |
| IKEM                                                                                                                            | 33                  | 17                        | 15                      | 9                                    | 7                                                               | 18                          |
| Trnava                                                                                                                          | 8                   | 3                         | 4                       | 3                                    | 3                                                               | 3                           |
| Total                                                                                                                           | 41                  | 20                        | 19                      | 12                                   | 10                                                              | 21                          |

G-POEM = Gastric Per Oral Endoscopic Pyloromyotomy

| Suppl Table S13. Screened and excluded (not enrolled) patients |                   |                        |                            |                                             |                                                     |
|----------------------------------------------------------------|-------------------|------------------------|----------------------------|---------------------------------------------|-----------------------------------------------------|
| Centre No.                                                     | Screened patients | Patients underwent GES | Patients with positive GES | Patients did not fulfill inclusion criteria | Patients fulfilled at least one exclusion criterium |
| IKEM                                                           | 147               | 136                    | 57                         | 8                                           | 15                                                  |
| Trnava                                                         | 42                | 42                     | 18                         | 7                                           | 4                                                   |
| Total                                                          | 189               | 178                    | 75                         | 15                                          | 19                                                  |

GES = Gastric Emptying Study (scintigraphy)

**Suppl Table S14. Definition of Adverse event (AE) / Serious Adverse Event (SAE)**

An adverse event (AE) is any undesirable, unintentional or unanticipated event that occurs during use of the investigational device, whether or not considered related to the therapy. A serious adverse event (SAE) is an event that is: fatal, life-threatening, results in persistent or significant disability/incapacity, requires or prolongs inpatient hospitalization, requires an intervention (endoscopy, radiology, surgery, etc.) postoperatively. Abdominal pain requiring analgetics without a need for prolongation of hospitalization was not considered as adverse event. SAE had to be reported within 24 hours to the Prague study center and the Ethics Committees / IRB if applicable. AE/AES were documented on designated CRF forms.

**Report of a Adverse Event Form**

Hospital visits due to follow up visits are not considered to be SAE.

☐ Initial report

☐ Consecutive report

Date AE start: \_\_\_\_ / \_\_\_\_ / \_\_\_\_ (DDMMYY)

☐ Expected event

☐ Unexpected event

Event related to G-POEM / SHAM procedure

☐ No

☐ Possibly

☐ Yes

Complication: ☐ Perforation

☐ Bleeding

☐ Infection

☐ Other

Please describe complication:

.....

Intervention required:

☐ No

☐ Yes

Please describe intervention

.....

Medication required:

☐ No

☐ Yes

Medication(s):

.....

**Report of a Serious Adverse Event**

Hospitalization or prolongation of hospital stay required (SAE):

☐ Yes

☐ No

If yes, please report within 24 hours to the Prague study center and Ethics Committee/IRB if applicable!

Date of hospitalisation/ - prolongation \_\_\_\_ (DDMMYY)

Date hospital discharge \_\_\_\_ (DDMMYY)

.....

☐ Event resolved

☐ Event ongoing

☐ Long term sequela

☐ Death

☐ Unknown

Description /

comment: .....

Date AE stop: \_\_\_\_ / \_\_\_\_ / \_\_\_\_ (DDMMYY)

| <b>Suppl Table S15. Overall incidence of adverse events</b> |                       |                                   |                                                      |                                                                                                                                                                                                                     |                      |
|-------------------------------------------------------------|-----------------------|-----------------------------------|------------------------------------------------------|---------------------------------------------------------------------------------------------------------------------------------------------------------------------------------------------------------------------|----------------------|
| Patient                                                     | Serious / non-serious | G-POEM / Sham / cross over G-POEM | Time of AEs occurrence after the allocated procedure | Adverse Event / Serious Adverse Event                                                                                                                                                                               | Related to procedure |
| 01-04                                                       | Serious               | G-POEM                            | 1 month                                              | Hospitalisation due to vomiting (not related to gastroparesis), probably food toxin                                                                                                                                 | no                   |
| 01-08                                                       | Non-serious           | G-POEM                            | 4 months                                             | Mild abdominal pain without need for analgetics                                                                                                                                                                     | no                   |
| 01-10                                                       | Serious               | cross over G-POEM                 | POD 1                                                | Sever abdominal pain, deep ulcer of the pylorus, prolonged hospitalisation for 6 days                                                                                                                               | yes                  |
| 01-11                                                       | Non-serious           | G-POEM                            | POD 0                                                | small periprocedural perforation of duodenal mucosae without need for intervention, no need for prolonged hospitalisation                                                                                           | yes                  |
| 01-26                                                       | Non-serious           | cross over G-POEM                 | POD 0                                                | Hyperglycemia (24 mmol/L) with mild metabolic acidosis                                                                                                                                                              | no                   |
| 01-26                                                       | Non-serious           | cross over G-POEM                 | POD 0                                                | Small gastric serosal perforation during G-POEM without need for intervention without sequelae                                                                                                                      | yes                  |
| 01-26                                                       | Non-serious           | cross over GPOEM                  | 6 months                                             | Non-complicated Hp- positive gastric ulcer of stomach, eradication of Hp                                                                                                                                            | no                   |
| 01-28                                                       | Serious               | Sham                              | 3 months                                             | Need for hospitalisation due to severe mycotic esophagitis not allowing to eat and newly diagnosed achalasia, pneumatic dilation of achalasia, NG tube placement for feeding, prolonged hospitalisation for 23 days | no                   |
| 01-28                                                       | Non-serious           | cross over G-POEM                 | 3 months                                             | Decompensation of achalasia, mycotic esophagitis, prolonged hospitalisation for 20 days                                                                                                                             | no                   |
| 01-30                                                       | Serious               | G-POEM                            | 1 month                                              | Vomiting, need for 3 days hospitalisation, temporary nasojunal tube placement, mycotic esophagitis                                                                                                                  | no                   |
| 01-30                                                       | Non-serious           | G-POEM                            | 4 months                                             | Feeding intolerance, hyponutrition                                                                                                                                                                                  | no                   |
| 01-31                                                       | Non-serious           | G-POEM                            | 3 months                                             | Hypoglycemia, no dumping syndrome                                                                                                                                                                                   | no                   |
| 01-32                                                       | Non-serious           | Sham                              | 2 months                                             | Recurrent abdominal pain, need for opioids                                                                                                                                                                          | no                   |

|       |             |                   |          |                                                                                                                                                   |     |
|-------|-------------|-------------------|----------|---------------------------------------------------------------------------------------------------------------------------------------------------|-----|
| 01-32 | Non serious | Sham              | 5 months | Vomiting, abdominal pains, administration of prokinetics and opioids                                                                              | no  |
| 01-32 | Serious     | Sham              | 5 months | Hospitalisation due to vomiting for 2 days, feeding intolerance, need for nasogastric tube placement and enteral nutrition                        | no  |
| 01-32 | Non-serious | Sham              | 5 months | Nausea, diarrhea, feeding intolerance, need for painkillers (opioids)                                                                             | no  |
| 01-32 | Non-serious | cross-over G-POEM | 1 month  | Severe nausea, feeding intolerance, need for administration of parenteral prokinetics                                                             | no  |
| 01-32 | Serious     | cross-over G-POEM | 4 months | Abdominal pains, weightloss, feeding intolerance, nasogastric tube placement, hospitalisation for 6 days, acute urinary retention, pains of ears. | no  |
| 01-35 | Serious     | G-POEM            | POD 0    | During G-POEM mucosal injury, prolonged hospitalisation for precautionary reasons for 7 days, no need for intervention or specific treatment      | yes |
| 01-38 | Serious     | G-POEM            | 3 months | Hospitalisation for 30 days due to hypocalcemia, examination before transplantation, diarrhea, hypoglycemia - confirmed dumping syndrome          | yes |
| 01-40 | Serious     | Sham              | 3 months | Hospitalisation for 1 day, abdominal pains, nausea                                                                                                | no  |
| 01-41 | Serious     | G-POEM            | 4 months | Hospitalisation for 6 days, due to intestinal infection – gastroenteritis                                                                         | no  |

POD = postoperative day

Hp = *Helicobacter pylori*

| <b>Suppl Table S16. Summary of adverse events (AE)</b>                |               |             |                          |
|-----------------------------------------------------------------------|---------------|-------------|--------------------------|
|                                                                       | <b>G-POEM</b> | <b>Sham</b> | <b>Cross-over G-POEM</b> |
|                                                                       |               |             |                          |
| <b>Serious AE – n</b>                                                 |               |             |                          |
| Hospitalisation (required or prolonged) related to procedure          | 2             | 0           | 1                        |
| Need for additional endoscopic, radiological or surgical intervention | 0             | 0           | 0                        |
| Hospitalisation (required or prolonged) not related to procedure      | 3             | 3           | 1                        |
| Live-threatening events                                               | 0             | 0           | 0                        |
| Death                                                                 | 0             | 0           | 0                        |
| <b>Overall</b>                                                        | <b>5</b>      | <b>3</b>    | <b>2</b>                 |
| <b>Overall SAEs related to procedure</b>                              | <b>2</b>      | <b>0</b>    | <b>1</b>                 |
| <b>Overall SAEs not related to procedure</b>                          | <b>3</b>      | <b>3</b>    | <b>1</b>                 |
|                                                                       |               |             |                          |
| <b>Non-serious AE – n</b>                                             |               |             |                          |
| Abdominal pain (not related to procedure)                             | 1             | 1           | 0                        |
| Periprocedural serosal perforation                                    | 1             | 0           | 1                        |
| Nausea or vomiting, feeding intolerance (not related to procedure)    | 1             | 2           | 1                        |
| Decompensation of achalasia with mycotic esophagitis                  | 0             | 0           | 1                        |
| Hypoglycemia/hyperglycemia                                            | 1             | 0           | 1                        |
| Gastric ulcer                                                         | 0             | 0           | 1                        |
| <b>Overall</b>                                                        | <b>4</b>      | <b>3</b>    | <b>5</b>                 |
| <b>Overall AEs related to procedure</b>                               | <b>1</b>      | <b>0</b>    | <b>1</b>                 |
| <b>Overall AEs not related to procedure</b>                           | <b>3</b>      | <b>3</b>    | <b>4</b>                 |



| <b>Suppl Table S17. Need for analgesics administration after G-POEM, sham procedure or cross-over G-POEM</b> |               |             |                   |
|--------------------------------------------------------------------------------------------------------------|---------------|-------------|-------------------|
|                                                                                                              | <b>G-POEM</b> | <b>Sham</b> | <b>Cross-over</b> |
| Number n (%)                                                                                                 | 10 (41%)      | 2 (10%)     | 4(33%)            |
| Total number of procedures                                                                                   | 21            | 20          | 12                |

Postprocedural pain necessitating administration of analgesics on postoperative days 0 or 1 was not considered as adverse event but rather a standard part of the postoperative course like with other similar procedures.

|                                                                                                                                                                                                                                                               |                       |                                  |                     |
|---------------------------------------------------------------------------------------------------------------------------------------------------------------------------------------------------------------------------------------------------------------|-----------------------|----------------------------------|---------------------|
| <b>Suppl Table S18. Procedure details.</b> The analysis was performed on the available data, one procedure length was missing. There was one technical failure of G-POEM procedure, which is included into the analysis but no closure was used in this case. |                       |                                  |                     |
| <b>Procedure length</b>                                                                                                                                                                                                                                       | <b>G-POEM</b><br>n=21 | <b>Cross-over G-POEM</b><br>n=12 | <b>Sham</b><br>n=19 |
| Mean                                                                                                                                                                                                                                                          | 76 min                | 58 min                           | 55 min              |
| Standard deviation                                                                                                                                                                                                                                            | 41 min                | 17 min                           | 9 min               |
| Median                                                                                                                                                                                                                                                        | 61 min                | 56 min                           | 55 min              |
| Minimal                                                                                                                                                                                                                                                       | 35 min                | 40 min                           | 40 min              |
| Maximal                                                                                                                                                                                                                                                       | 185 min               | 91 min                           | 76 min              |
| <b>Length of myotomy</b>                                                                                                                                                                                                                                      | <b>G-POEM</b>         | <b>Cross-over G-POEM</b>         | <b>Sham</b>         |
| Mean                                                                                                                                                                                                                                                          | 27 mm                 | 27 mm                            | -                   |
| Standard deviation                                                                                                                                                                                                                                            | 7 mm                  | 4 mm                             | -                   |
| Median                                                                                                                                                                                                                                                        | 30 mm                 | 30 mm                            | -                   |
| Minimal                                                                                                                                                                                                                                                       | 25 mm                 | 20 mm                            | -                   |
| Maximal                                                                                                                                                                                                                                                       | 30 mm                 | 30 mm                            | -                   |
| <b>Hospitalization after procedure</b>                                                                                                                                                                                                                        | <b>G-POEM</b>         | <b>Cross-over G-POEM</b>         | <b>Sham</b>         |
| Mean                                                                                                                                                                                                                                                          | 1.9 days              | 2.4 days                         | 1 day               |
| Standard deviation                                                                                                                                                                                                                                            | 1.4 days              | 1.3 days                         | 0 days              |
| Median                                                                                                                                                                                                                                                        | 1.5 days              | 2 days                           | 1 day               |
| Minimal                                                                                                                                                                                                                                                       | 1 day                 | 1 day                            | 1 day               |
| Maximal                                                                                                                                                                                                                                                       | 7 days                | 6 days                           | 1 day               |
|                                                                                                                                                                                                                                                               |                       |                                  |                     |
| Technical success                                                                                                                                                                                                                                             | 95% (20/21)           | 100% (12/12)                     | NA                  |
| Closure with endoclips (n)                                                                                                                                                                                                                                    | 9                     | 8                                | NA                  |
| Closure with endoscopic suturing system, (n)                                                                                                                                                                                                                  | 11                    | 4                                | NA                  |
| Need for capnoperitoneum puncture                                                                                                                                                                                                                             | No                    | No                               | No                  |
| Other gas related adverse events                                                                                                                                                                                                                              | No                    | No                               | No                  |
| Anesthesia related adverse events                                                                                                                                                                                                                             | No                    | No                               | No                  |

NA = not applicable

**Suppl. Table S19. Treatment success for the primary outcome, sensitivity analysis and etiology subgroups.** In this trial, treatment success was defined as a reduction by 50% from baseline GCSI for the primary G-POEM and sham procedure and as a reduction by 50% from the 6 months visit (after the sham procedure) for the cross-over G-POEM. In addition, table shows treatment success rates if the treatment success had been defined as a decrease of GCSI by 1 point (a common definition of treatment success). Subgroup analysis in different etiologies of gastroparesis after cross-over G-POEM was not performed because of small numbers of patients. For the ITT population, one of the 41 values (2 %) was multiply imputed (in the sham group). For the worst case scenario, we assumed treatment failure for the G-POEM patient with technical failure and treatment success in the sham patient with missing GCSI data.

| <b>Treatment success rate [%] (95% CI) at 6 months</b> | <b>G-POEM</b> | <b>N</b> | <b>Sham</b>  | <b>N</b> | <b>Cross-over G-POEM</b> | <b>N</b> |
|--------------------------------------------------------|---------------|----------|--------------|----------|--------------------------|----------|
| ITT population, GCSI reduction by 50 %                 | 71 (50 – 86)  | 21       | 22 (8 – 47)  | 20       | 75 (47 – 91)             | 12       |
| PP population, GCSI reduction by 50 %                  | 70 (48 – 85)  | 20       | 21 (9 – 43)  | 19       | 75 (47 – 91)             | 12       |
| Worst case scenario, GCSI reduction by 50 %            | 67 (45 – 83)  | 21       | 25 (11 – 47) | 20       | 75 (47 – 91)             | 12       |
| Diabetic etiology (ITT, reduction by 50 %)             | 89 (56 – 98)  | 9        | 17 (3 – 57)  | 8        | Not applicable           |          |
| Post-surgical etiology (ITT, reduction by 50 %)        | 50 (18 – 82)  | 6        | 29 (7 – 67)  | 7        | Not applicable           |          |
| Idiopathic etiology (ITT, reduction by 50 %)           | 67 (30 – 90)  | 6        | 20 (3 – 67)  | 5        | Not applicable           |          |
| ITT population, GCSI reduction by 1 point              | 95 (76 – 99)  | 21       | 37 (19 – 60) | 20       | 75 (47 – 91)             | 12       |
| <b>Treatment success rate [%] (95% CI) at 3 months</b> | <b>G-POEM</b> | <b>N</b> | <b>Sham</b>  | <b>N</b> | <b>Cross-over G-POEM</b> | <b>N</b> |
| ITT population, GCSI reduction by 50 %                 | 57 (36 – 76)  | 21       | 22 (8 – 47)  | 20       | 58 (32 – 81)             | 12       |
| PP population, GCSI reduction by 50 %                  | 55 (34 – 74)  | 20       | 21 (9 – 43)  | 19       | 58 (32 – 81)             | 12       |
| Worst case scenario, GCSI reduction by 50 %            | 52 (32 – 72)  | 21       | 25 (11 – 47) | 20       | 58 (32 – 81)             | 12       |
| Diabetic etiology (ITT, reduction by 50 %)             | 67 (35 – 88)  | 9        | 17 (3 – 57)  | 8        | Not applicable           |          |
| Post-surgical etiology (ITT, reduction by 50 %)        | 33 (9 – 72)   | 6        | 43 (15 – 76) | 7        | Not applicable           |          |
| Idiopathic etiology (ITT, reduction by 50 %)           | 67 (30 – 90)  | 6        | 0 (0 – 43)   | 5        | Not applicable           |          |
| ITT population, GCSI reduction by 1 point              | 76 (55 – 89)  | 21       | 42 (23 – 64) | 20       | 67 (39 – 86)             | 12       |

ITT – intention to treat population (all patients evaluated according to their allocation, missing data multiply imputed)

PP – per protocol population (only patients following the study protocol)

GCSI – gastroparesis cardinal symptom index

N – number of patients in a given group

**Suppl. Table S20. Evolution of variables in time.** The table presents estimates of medians of various quantities at different time points in the study and differences between time points. The differences are calculated on a single patient level. The confidence intervals (CI) are not corrected for multiple testing. The analysis was performed on the ITT population with 21, 20, and 12 patients in the G-POEM, sham, and cross-over G-POEM groups, respectively. In total, 2 GCSI values (1 %), 3 PAGI-SYM values (2 %), 7 PAGI-QoL values (5 %) and 10 GES values (5 %) were imputed across all groups and time points.

|                                   | Values at visits |                 |                 | Decrease from baseline* |                   |
|-----------------------------------|------------------|-----------------|-----------------|-------------------------|-------------------|
| Variable – median (95% CI)        | Baseline         | 3 months        | 6 months        | to 3 months             | to 6 months       |
| GCSI – G-POEM                     | 3.5 (3.2 – 3.7)  | 1.4 (0.9 – 1.9) | 1.1 (0.5 – 1.5) | 2.3 (1.3 – 2.6)         | 2.4 (2.0 – 2.8)   |
| GCSI – sham                       | 3.2 (2.8 – 3.4)  | 2.5 (1.9 – 3.1) | 2.5 (1.9 – 3.2) | 0.8 (0.1 – 1.2)         | 0.7 (0.0 – 1.2)   |
| PAGI-SYM – G-POEM                 | 2.7 (2.0 – 3.0)  | 0.9 (0.7 – 1.4) | 0.7 (0.5 – 1.2) | 1.5 (1.0 – 1.9)         | 1.5 (1.2 – 2.0)   |
| PAGI-SYM – sham                   | 2.8 (2.5 – 3.0)  | 2.0 (1.5 – 2.8) | 2.0 (1.5 – 2.6) | 0.7 (0.1 – 1.1)         | 0.5 (0.1 – 1.1)   |
| PAGI-QoL – G-POEM                 | 2.1 (1.7 – 2.5)  | 1.6 (0.9 – 2.5) | 0.8 (0.6 – 1.5) | 0.3 (-0.5 – 0.9)        | 1.1 (0.1 – 1.6)   |
| PAGI-QoL – sham                   | 2.5 (1.5 – 2.9)  | 1.9 (1.2 – 2.7) | 1.7 (1.2 – 2.4) | 0.4 (-0.2 – 0.7)        | 0.4 (-0.1 – 0.8)  |
| BMI [kg/m <sup>2</sup> ] – G-POEM | 22 (19 – 26)     | 22 (20 – 25)    | 22 (21 – 26)    | -0.4 (-1.2 – 0.5)       | -0.7 (-1.8 – 0.2) |
| BMI [kg/m <sup>2</sup> ] – sham   | 26 (21 – 28)     | 24 (21 – 27)    | 24 (21 – 28)    | -0.4 (-1.0 – 0.4)       | -0.7 (-1.2 – 0.4) |
| GES 4h retention [%] – G-POEM     | 22 (17 – 31)     | 12 (5 – 22)     |                 | 12 (3 – 19)             |                   |
| GES 4h retention [%] – sham       | 26 (18 – 39)     | 24 (11 – 35)    |                 | 6 (-7 – 19)             |                   |
| GES ret. halftime [min] – G-POEM  | 152 (127 – 185)  | 95 (77 – 118)   |                 | 53 (5 – 94)             |                   |
| GES ret. halftime [min] – sham    | 157 (128 – 263)  | 110 (82 – 158)  |                 | 49 (-3 – 144)           |                   |
|                                   |                  |                 |                 |                         |                   |

|                                              | Values at visits                        |                           |                           | Decrease from baseline *     |                              |
|----------------------------------------------|-----------------------------------------|---------------------------|---------------------------|------------------------------|------------------------------|
| Variable – median (95% CI)                   | Baseline (= 6 months visit after sham)‡ | 3 months after cross-over | 6 months after cross-over | to 3 months after cross-over | to 6 months after cross-over |
| GCSI – cross-over G-POEM                     | 2.8 (2.5 – 3.7)                         | 1.1 (0.7 – 1.9)           | 1.0 (0.6 – 1.7)           | 1.9 (1.1 – 2.4)              | 2.1 (1.3 – 2.6)              |
| PAGI-SYM – cross-over G-POEM                 | 2.2 (1.9 – 3.0)                         | 0.8 (0.6 – 1.6)           | 0.5 (0.4 – 1.8)           | 1.3 (1.0 – 2.0)              | 1.6 (0.8 – 2.2)              |
| PAGI-QoL – cross-over G-POEM                 | 2.2 (1.3 – 3.3)                         | 1.8 (0.9 – 2.6)           | 1.6 (0.7 – 2.3)           | 0.5 (-0.1 – 1.5)             | 0.3 (-0.1 – 1.6)             |
| BMI [kg/m <sup>2</sup> ] – cross-over G-POEM | 22 (19 – 26)                            | 22 (19 – 27)              | 22 (20 – 27)              | 0.0 (-1.0 – 0.9)             | -0.2 (-1.1 – 0.5)            |
|                                              | Baseline (= 3 months visit after sham)‡ | 3 months after cross-over |                           | to 3 months after cross-over |                              |
| GES 4h ret. [%] – cross-over G-POEM          | 24 (11 – 38)                            | 7 (1 – 14)                |                           | 13 (5 – 23)                  |                              |
| GES ret. halftime [min] – cross-over G-POEM  | 138 (83 – 178)                          | 66 (32 – 154)             |                           | 80 (29 – 179)                |                              |

\* The table presents a decrease, so positive values indicate reduction of the score/measurement.

‡ For the cross-over procedure, values obtained at 6 months visit (at 3 months in case of gastric emptying study) after the sham procedure are considered as baseline value

GCSI = Gastroparesis Cardinal Symptom Index (see also suppl table S5)

PAGI-SYM = Patient Assessment of Upper Gastrointestinal Symptom Severity Index (see also suppl table S9)

PAGI QoL = Patient Assessment of Upper Gastrointestinal Disorders-Quality of Life (see also suppl table S10)

GES = Gastric Emptying Study

ITT = Intention To Treat

**Suppl. Table S21. Evolution of GCSI sub-scores in time.** Means of GCSI subscales are presented at different time points in the study and differences between time points. The differences are calculated on a single patient level. The Nausea / vomiting subscale comprises of the questions 1 to 3, Fullness of questions 4 to 7 and Bloating of questions 8 and 9 (see Table S5). The confidence intervals (CI) are not corrected for multiple testing. The analysis was performed on the available data basis with N=21 for G-POEM, N=19 for sham, and N=12 for cross-over G-POEM.

|                          | Values at visits                        |                           |                           | Decrease from baseline*            |                              |
|--------------------------|-----------------------------------------|---------------------------|---------------------------|------------------------------------|------------------------------|
| Variable – mean (95% CI) | Baseline                                | 3 months                  | 6 months                  | to 3 months                        | to 6 months                  |
| <b>G-POEM</b>            |                                         |                           |                           |                                    |                              |
| Nausea / vomiting        | 3.3 (2.8 – 3.7)                         | 1.3 (0.7 – 1.9)           | 0.8 (0.4 – 1.2)           | 2.1 (1.5 – 2.6)                    | 2.5 (2.1 – 3.0)              |
| Fullness                 | 3.6 (3.4 – 3.9)                         | 1.7 (1.3 – 2.0)           | 1.2 (0.8 – 1.7)           | 2.0 (1.6 – 2.4)                    | 2.4 (2.0 – 2.9)              |
| Bloating                 | 3.5 (3.0 – 4.0)                         | 1.5 (0.9 – 2.0)           | 1.4 (0.9 – 1.9)           | 2.0 (1.5 – 2.6)                    | 2.1 (1.6 – 2.6)              |
| <b>Sham</b>              |                                         |                           |                           |                                    |                              |
| Nausea / vomiting        | 3.0 (2.5 – 3.4)                         | 2.0 (1.4 – 2.4)           | 1.8 (1.4 – 2.4)           | 1.1 (0.7 – 1.7)                    | 1.2 (0.6 – 1.8)              |
| Fullness                 | 3.4 (3.1 – 3.7)                         | 3.0 (2.6 – 3.4)           | 2.9 (2.5 – 3.4)           | 0.4 (-0.2 – 0.9)                   | 0.5 (0.1 – 1.0)              |
| Bloating                 | 3.3 (2.6 – 3.8)                         | 2.6 (1.9 – 3.3)           | 3.0 (2.3 – 3.7)           | 0.7 (0.4 – 1.1)                    | 0.3 (-0.3 – 1.0)             |
|                          | Values at visits                        |                           |                           | Decrease from 6 months after sham* |                              |
| Variable – mean (95% CI) | Baseline (= 6 months visit after sham)‡ | 3 months after cross-over | 6 months after cross-over | to 3 months after cross-over       | to 6 months after cross-over |
| <b>Cross-over G-POEM</b> |                                         |                           |                           |                                    |                              |
| Nausea / vomiting        | 2.2 (1.6 – 2.8)                         | 0.7 (0.3 – 1.3)           | 0.6 (0.2 – 1.1)           | 1.5 (1.0 – 2.1)                    | 1.6 (1.0 – 2.3)              |
| Fullness                 | 3.5 (3.1 – 3.9)                         | 1.4 (0.8 – 2.0)           | 1.3 (0.9 – 1.6)           | 2.1 (1.4 – 2.8)                    | 2.3 (1.8 – 2.7)              |
| Bloating                 | 3.5 (2.7 – 4.2)                         | 1.9 (1.4 – 2.4)           | 1.5 (0.9 – 2.2)           | 1.7 (1.2 – 2.0)                    | 2.0 (1.4 – 2.7)              |

\* The table presents decrease, so positive values indicate reduction of the score/measurement.

‡ For the cross-over procedure, values obtained at 6 months visit after the sham procedure were considered as baseline values.

GCSI – gastroparesis cardinal symptom index

**Suppl. Table S22. Endoflip® measurements – primary G-POEM and cross-over G-POEM combined.** Means of pyloric distensibility are presented at different time points in the study and differences between time points. The differences are calculated on a single patient level. The confidence intervals (CI) are not corrected for multiple testing. The table presents only available data; the imputation model was not used as over 50% of data is missing because the measurement of pyloric distensibility was added after beginning of the trial.

Note that at pre-procedure, post-procedure, and follow-up time points there were 16, 17, and 15 (14 for filling volume 50 mL) values available. There were 14 values for the pre vs. post treatment difference and 12 values for the pre vs. follow-up difference.

|                             | Values at visits |                    |                    | Increase from pre-procedure ‡ |                       |
|-----------------------------|------------------|--------------------|--------------------|-------------------------------|-----------------------|
| Variable – mean (95% CI)    | Pre-G-POEM       | Post-G-POEM        | 3 months follow-up | to post-G-POEM                | to 3 months follow-up |
| DI [mm2/mmHg] 30 mL filling | 6.8 (5.2 – 8.4)  | 12.6 (10.3 – 14.9) | 10.2 (8.6 – 11.8)  | 7.4 (6.0 – 9.0)               | 5.2 (3.4 – 7.5)       |
| DI [mm2/mmHg] 40 mL filling | 7.6 (6.0 – 9.3)  | 12.7 (11.4 – 14.3) | 13.1 (11.3 – 15.7) | 5.4 (3.7 – 7.0)               | 8.0 (5.5 – 10.2)      |
| DI [mm2/mmHg] 50 mL filling | 9.1 (6.5 – 12.4) | 11.6 (9.5 – 14.1)  | 10.3 (8.2 – 12.4)  | 2.6 (0.7 – 4.4)               | 3.6 (1.2 – 6.0)       |
| CSA [mm2] 30 mL filling     | 91 (75 – 107)    | 128 (114 – 142)    | 142 (111 – 176)    | 50 (35 – 64)                  | 35 (10 – 58)          |
| CSA [mm2] 40 mL filling     | 144 (125 – 165)  | 199 (177 – 219)    | 206 (185 – 234)    | 66 (36 – 99)                  | 64 (37 – 83)          |
| CSA [mm2] 50 mL filling     | 216 (180 – 247)  | 291 (267 – 319)    | 279 (246 – 306)    | 92 (63 – 120)                 | 66 (18 – 110)         |

‡ The estimates of change are based only on cases where both relevant values were available. Therefore, the expected median difference does not have to correspond to the difference in medians for the corresponding visits. Please note that increase of both DI and CSA at all three filling volumes are significant.

DI – distensibility index

CSA – cross-sectional area

| <b>Supp. Table S23. List of pre-specified primary and secondary outcomes and post-hoc outcomes and other analyses with references</b> |                                                                       |
|---------------------------------------------------------------------------------------------------------------------------------------|-----------------------------------------------------------------------|
| <b>Primary outcome</b>                                                                                                                |                                                                       |
| Treatment success at 6 months                                                                                                         | Table S19, Figures 2 (main document), S3                              |
| <b>Secondary outcomes</b>                                                                                                             |                                                                       |
| Treatment success at 3 months                                                                                                         | Table S19, Figure S4                                                  |
| Treatment success in per-protocol population                                                                                          | Table S19, Figures 2 (main document), S3, S4                          |
| Treatment success in etiology sub-groups                                                                                              | Table S19, Figures 2 (main document), S3, S4                          |
| Treatment success predictors                                                                                                          | Table S2 (main document)                                              |
| GCSI score                                                                                                                            | Tables 1 (main document), S20, S21, Figures 3 (main document), S5, S6 |
| PAGI-SYM score                                                                                                                        | Table S20, Figure S7                                                  |
| PAGI-QoL score                                                                                                                        | Tables 1 (main document), S20, Figure S8                              |
| GES 4h retention                                                                                                                      | Tables 1 (main document), S20, Figures 4 (main document), S9          |
| GES retention halftime                                                                                                                | Table S20, Figure S10                                                 |
| BMI                                                                                                                                   | Tables 1 (main document), S20                                         |
| Endoflip® DI and CSA (pyloric distensibility)                                                                                         | Table S22, Figure S11                                                 |
| Adverse events                                                                                                                        | Tables S14, S15, S16                                                  |
| Need for analgetics (pain analysis)                                                                                                   | Table S17                                                             |
| <b>Post hoc analyses</b>                                                                                                              |                                                                       |
| GCSI by sub-scores                                                                                                                    | Table S21, Figure S6                                                  |
| GCSI and GES correlation at 3 months                                                                                                  | Figure S12                                                            |
| <b>Other analyses</b>                                                                                                                 |                                                                       |
| Baseline Demographic and Clinical characteristics                                                                                     | Table 1 (main document)                                               |
| Procedure details                                                                                                                     | Table S18                                                             |
| Patients treated in centres in and out of the Trial                                                                                   | Tables S12                                                            |
| Screened and enrolled patients                                                                                                        | Tables S13                                                            |

GCSI = Gastroparesis Cardinal Symptom Index

PAGI-SYM = Patient Assessment of Gastrointestinal Disorders Symptom Severity Index

PAGI-QoL = Quality of Life Questionnaire

GES = Gastric Emptying Study

BMI = Body Mass Index

DI = distensibility

CSA= Cross-Sectional Area



SUPPLEMENTARY FIGURES

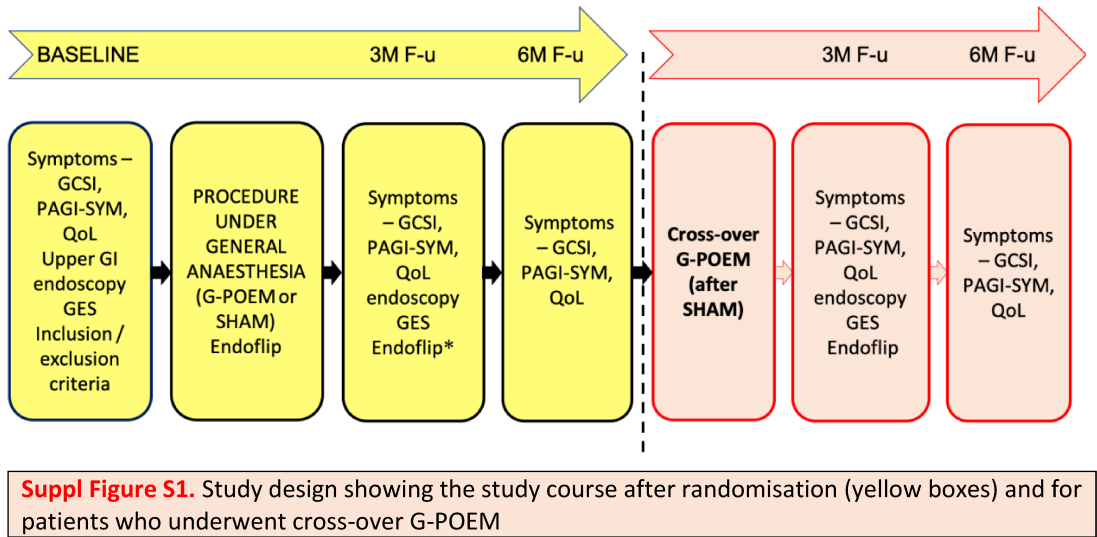

\* In patients having undergone Endoflip during the sham procedure, no Endoflip measurement was repeated prior to G-POEM.

GCSI = Gastroparesis Cardinal Symptom Index (see also suppl table S5)  
PAGI-SYM = Patient Assessment of Upper Gastrointestinal Symptom Severity Index (see also suppl table S9)  
PAGI QoL = Patient Assessment of Upper Gastrointestinal Disorders-Quality of Life (see also suppl table S10)  
GES = Gastric Emptying Study  
3M, 6M = 3 months, 6 months visit

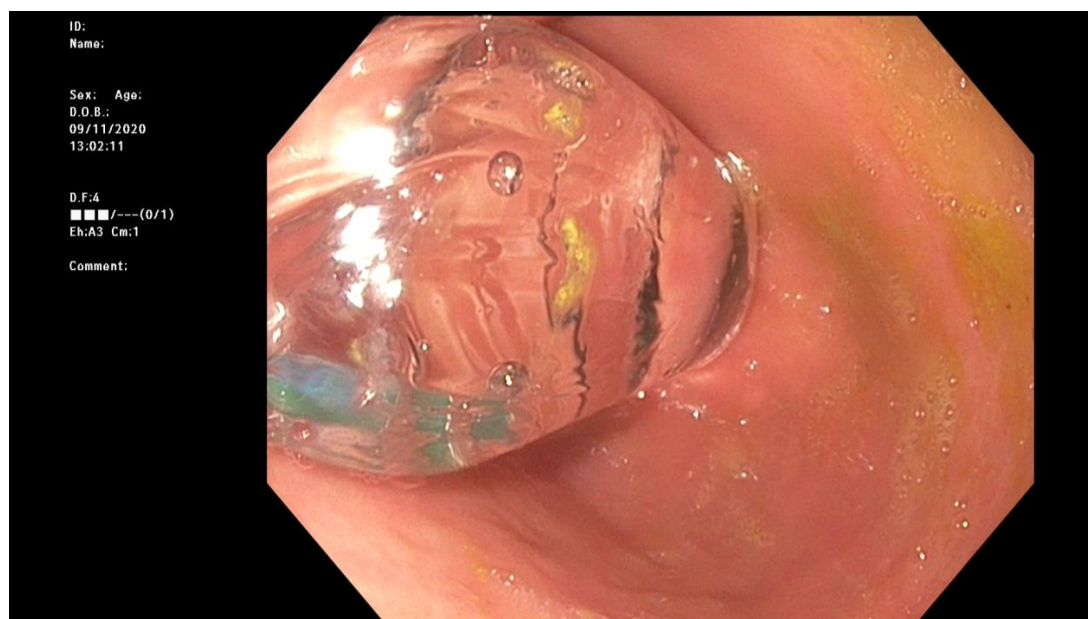

**Suppl Figure S2a. Measurement of pyloric distensibility.** A balloon is introduced through the pylorus under endoscopic control and inflated automatically. Figure shows endoscopic image during measurement

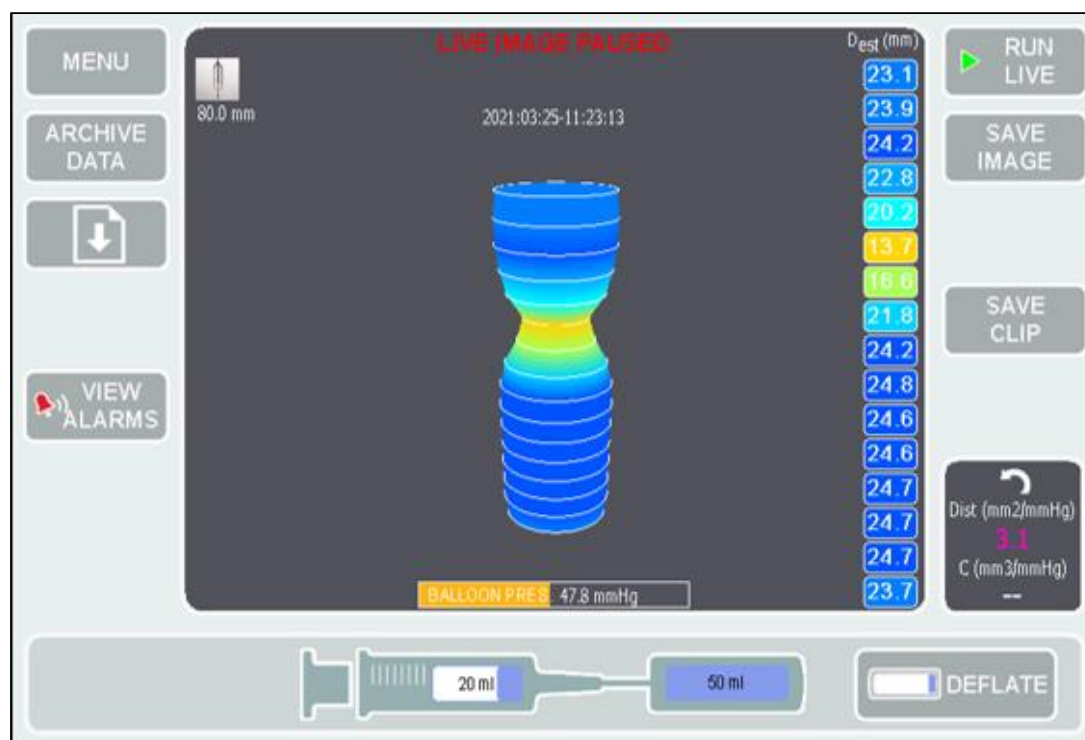

**Suppl Figure S2b. Measurement of pyloric distensibility.** An hourglass shape image on the Endoflip monitor during measurement. The narrowed place in the picture points to a pylorus. In the right down corner a value shows pyloric distensibility (3.1mm<sup>2</sup>/mmHg)

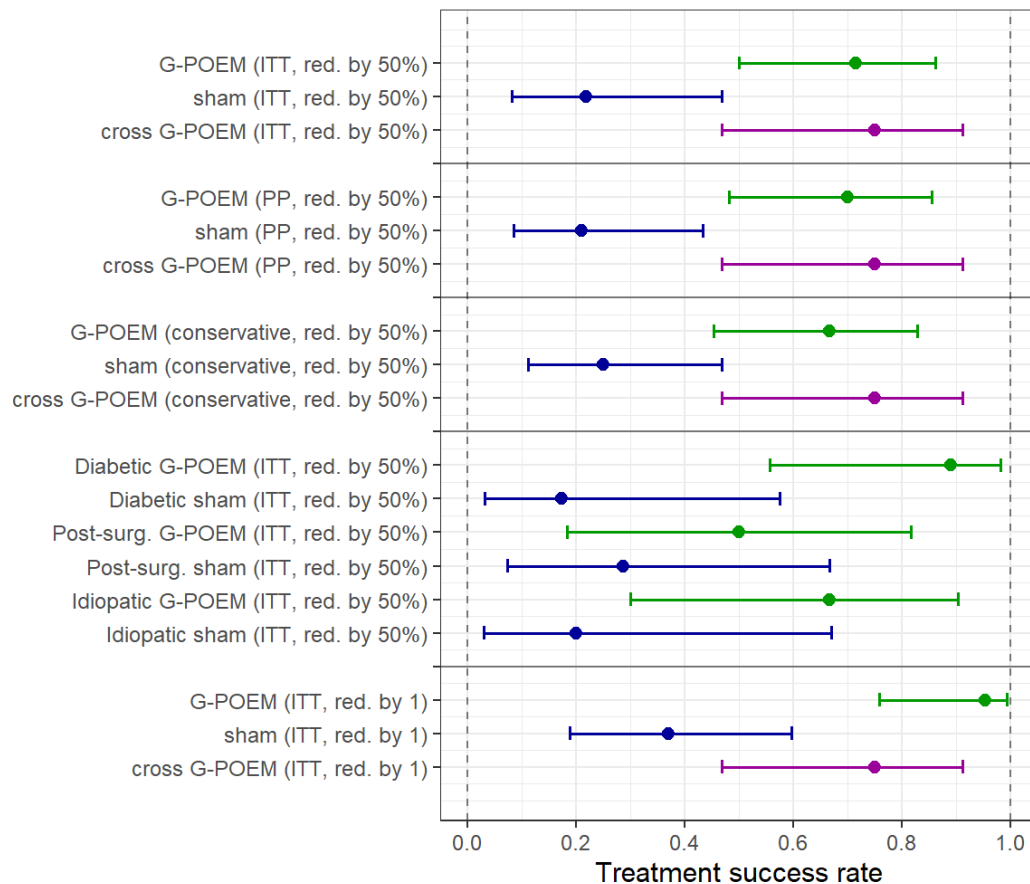

**Suppl Figure S3. Treatment success at 6 months after procedure, from top to bottom:**

- the main outcome on the intention to treat (ITT) population with treatment success defined as reduction of the total GCSI score by 50% from baseline,
- treatment success evaluated on the per-protocol (PP) population (for cross-over the ITT population and PP population are the same),
- treatment success evaluated with the most conservative approach (worst case scenario), where the patient with technical failure of G-POEM is assigned failure and the sham patient who withdraw consent is assigned success (note, that overlap of confidence intervals does not exclude significant difference, which is 42% with 95% CI: 9% to 74% not containing zero),
- treatment success in sub-groups defined by etiology of gastroparesis,
- treatment success on the ITT population defined as reduction of the total GCSI score by 1 point from baseline.

The results analyzed on the intention to treat (ITT) population (N=41, N<sub>Di-G-POEM</sub>=9, N<sub>Di-Sham</sub>=8, N<sub>PS-G-POEM</sub>=6, N<sub>PS-Sham</sub>=7, N<sub>Id-G-POEM</sub>=6, N<sub>Id-Sham</sub>=5, 1 value (2 %) imputed in diabetic GP patient in the sham group) are supplemented by the main outcome analysis on the per protocol (PP) population (N=39).

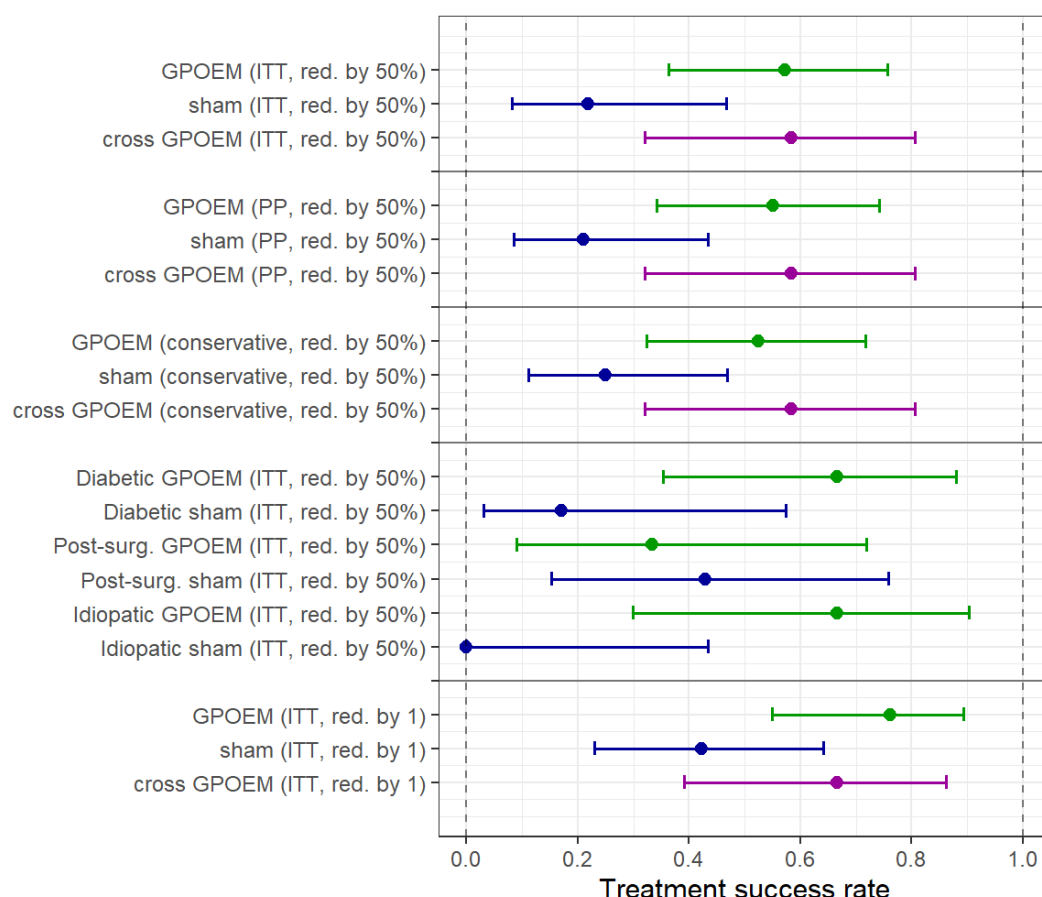

**Suppl Figure S4. Treatment success 3 months after procedure, from top to bottom:**

- treatment success in the G-POEM, sham and cross-over arms on the intention to treat (ITT) population with treatment success defined as reduction of the total GCSI score by 50% from baseline,
- treatment success evaluated on the per-protocol (PP) population,
- treatment success evaluated with the most conservative approach (worst case scenario), where the patient with technical failure of G-POEM is assigned failure (despite having success) and the sham patient who withdraw consent is assigned success,
- treatment success in sub-groups defined by etiology of gastroparesis (not evaluated for cross-over G-POEM due to low number of patients in groups),
- treatment success on the ITT population defined as reduction of the total GCSI score by 1 point from baseline.

The results analyzed on the intention to treat (ITT) population ( $N=41$ ,  $N_{\text{Di-G-POEM}}=9$ ,  $N_{\text{Di-Sham}}=8$ ,  $N_{\text{PS-G-POEM}}=6$ ,  $N_{\text{PS-Sham}}=7$ ,  $N_{\text{Id-G-POEM}}=6$ ,  $N_{\text{Id-Sham}}=5$ , 1 value (2 %) imputed in diabetic GP patient in the sham group) are supplemented by the analysis on the per protocol (PP) population ( $N=39$ ).

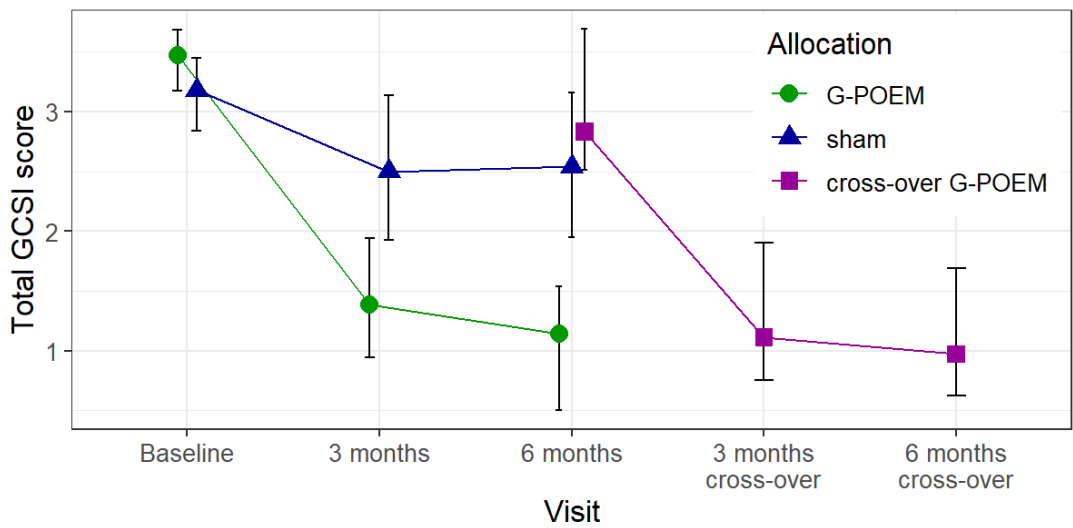

**Suppl Figure S5a. Evolution of the GCSI total score.** Point estimates of medians with 95% confidence intervals calculated on the ITT population are shown for patients after the G-POEM procedure (green circles, N=21), sham procedure (blue triangles, N=20, imputed 1 value (5 %) for 3 months and 1 value (5 %) for 6 months), and cross-over G-POEM procedure (purple squares, N=12). For the cross-over G-POEM group the value at 6 months reflects only the data for the patients in this group (who subsequently underwent the cross-over G-POEM procedure). Points are connected for visual aid.

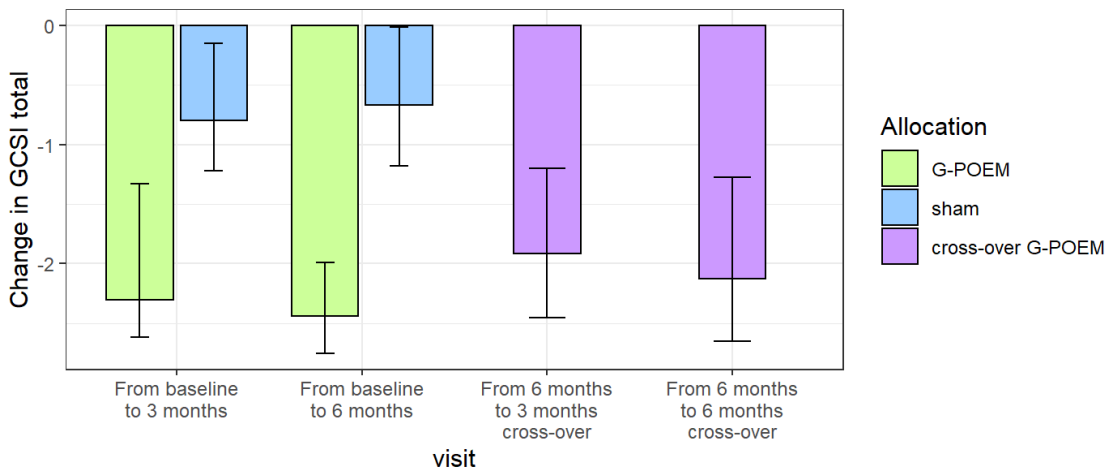

**Suppl Figure S5b. Changes of the GCSI total score between visits.** Point estimates of medians of differences between the specified visits with 95% confidence intervals calculated on the ITT population are shown for patients after the G-POEM procedure (green, N=21), sham procedure (blue, N=20, imputed 1 value (5 %) for 3 months and 1 value (5 %) for 6 months), and cross-over G-POEM procedure (purple, N=12) (patients who subsequently underwent the cross-over G-POEM procedure).

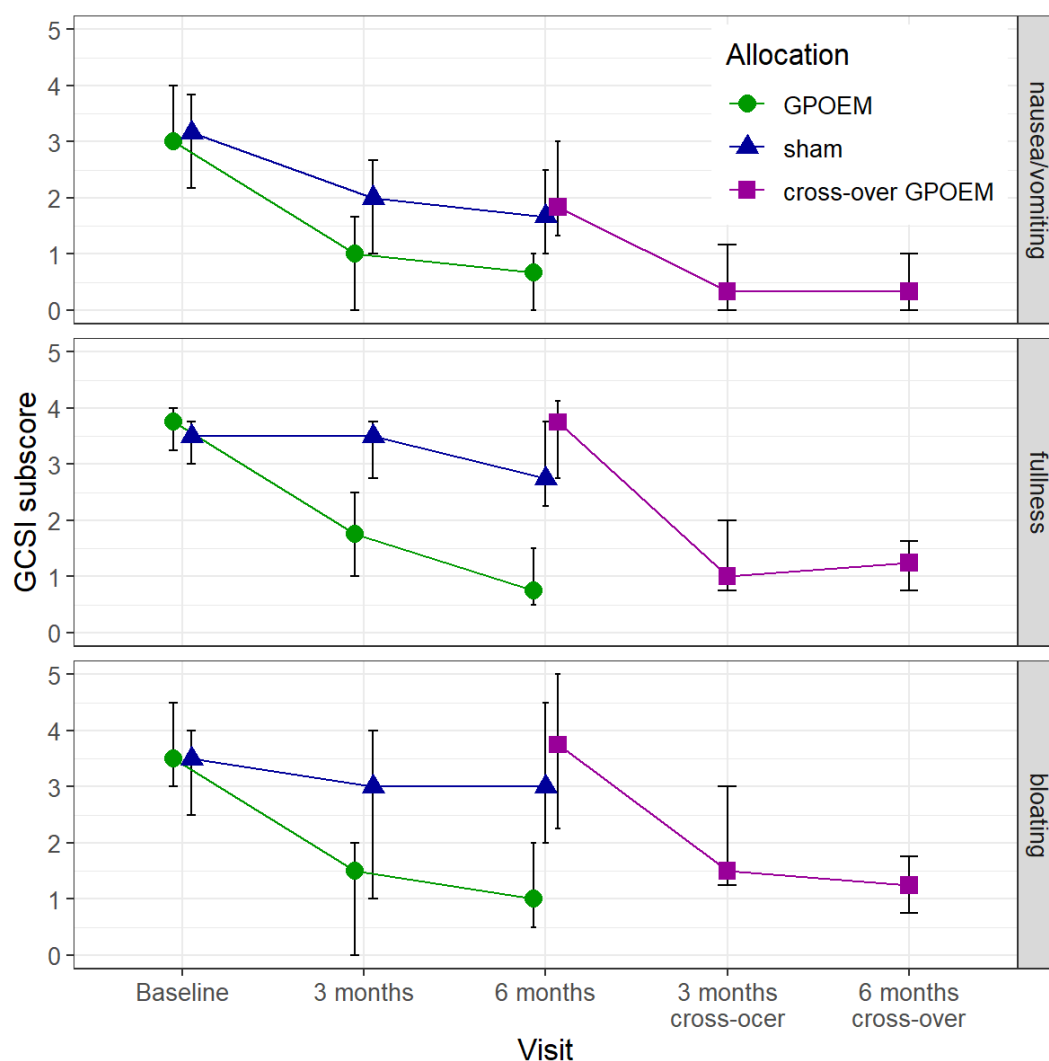

**Suppl Figure S6. Evolution of the GCSI sub-scores.** Point estimates of medians with 95% confidence intervals calculated on the available data are shown for patients after the G-POEM procedure (green circles, N=21), sham procedure (blue triangles, N=19), and cross-over G-POEM procedure (purple squares, N=12). For the cross-over G-POEM group the value at 6 months reflects only the data for the patients in this group (patients who subsequently underwent the cross-over G-POEM procedure). Points are connected for visual aid. The nausea / vomiting subscale comprises of the questions 1 to 3, Fullness of questions 4 to 7 and Bloating of questions 8 and 9, see Table S5.

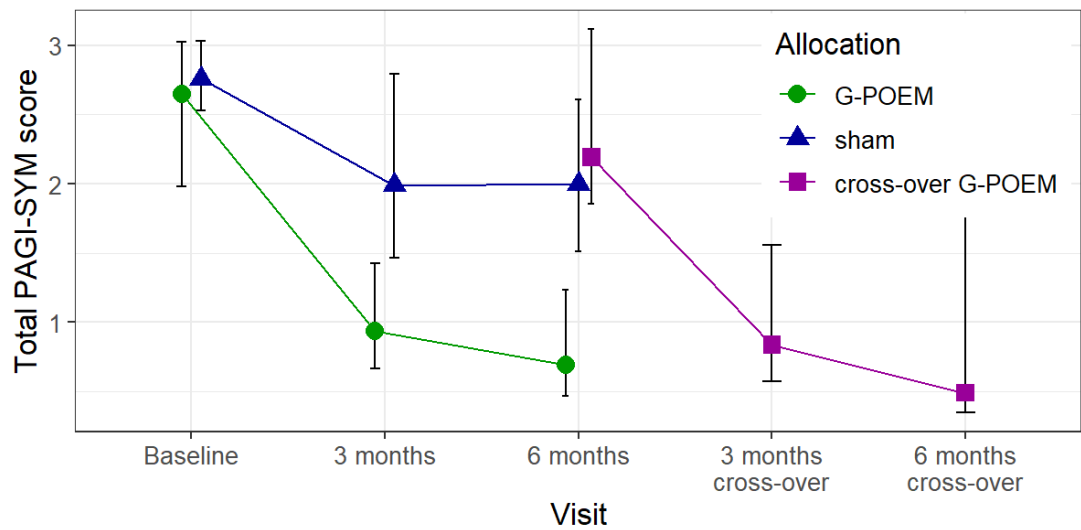

**Suppl Figure S7a. Evolution of the PAGI-SYM total score.** Point estimates of medians with 95% confidence intervals calculated on the ITT population are shown for patients after the G-POEM procedure (green circles, N=21), sham procedure (blue triangles, N=20, imputed 1 value (5 %) for 3 months and 1 value (5 %) for 6 months), and cross-over G-POEM procedure (purple squares, N=12). For the cross-over G-POEM group the value at 6 months reflects only the data for the patients in this group (patients who subsequently underwent the cross-over G-POEM procedure). Points are connected for visual aid.

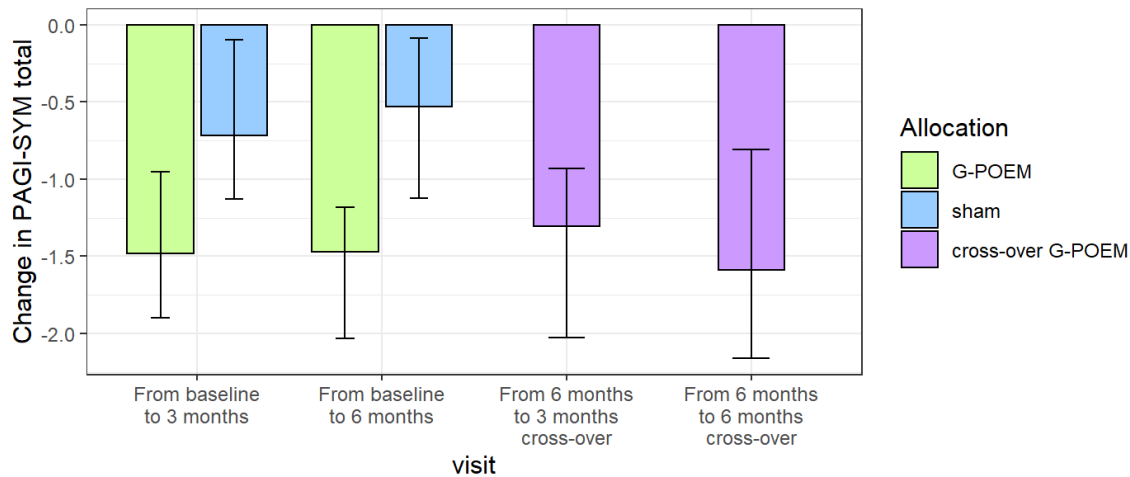

**Suppl Figure S7b. Changes of the PAGI-SYM total score between visits.** Point estimates of medians of differences between the specified visits with 95% confidence intervals calculated on the ITT population are shown for patients after the G-POEM procedure (green, N=21), sham procedure (blue, N=20, imputed 1 value (5 %) for 3 months and 1 value (5 %) for 6 months), and cross-over G-POEM procedure (purple, N=12) (patients who subsequently underwent the cross-over G-POEM procedure).



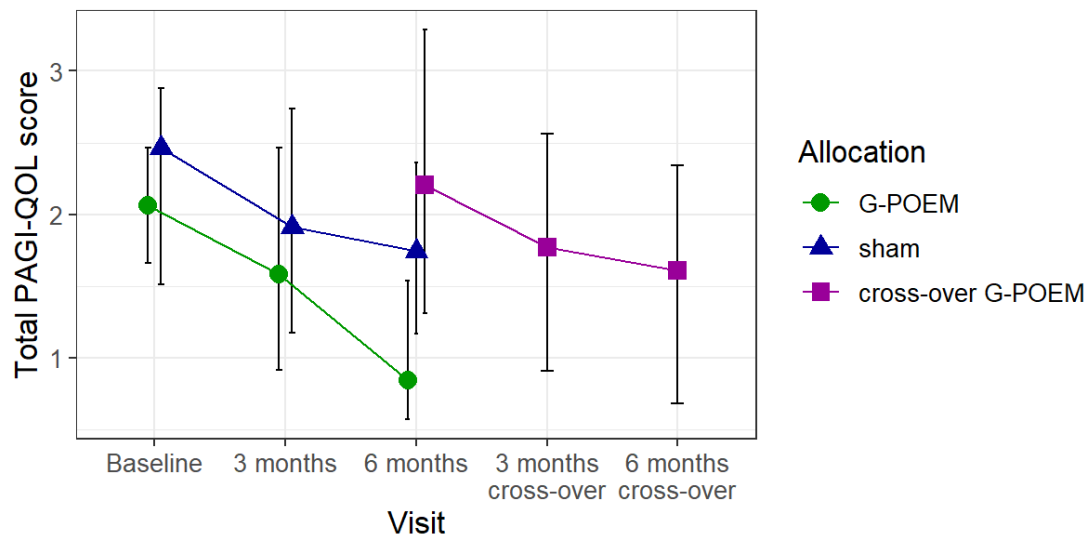

**Suppl Figure S8a. Evolution of the PAGI-QoL total score.** Point estimates of medians with 95% confidence intervals calculated on the ITT population are shown for patients after the G-POEM procedure (green circles, N=21, imputed 1 value (5 %) for 3 months and 1 value (5 %) for 6 months), sham procedure (blue triangles, N=20, imputed 1 value (5 %) for baseline, 1 value (5 %) for 3 months , and 1 value (5 %) for 6 months), and cross-over G-POEM procedure (purple squares, N=12). For the cross-over G-POEM group the value at 6 months reflects only the data for the patients in this group (patients who subsequently underwent the cross-over G-POEM procedure). Points are connected for visual aid.

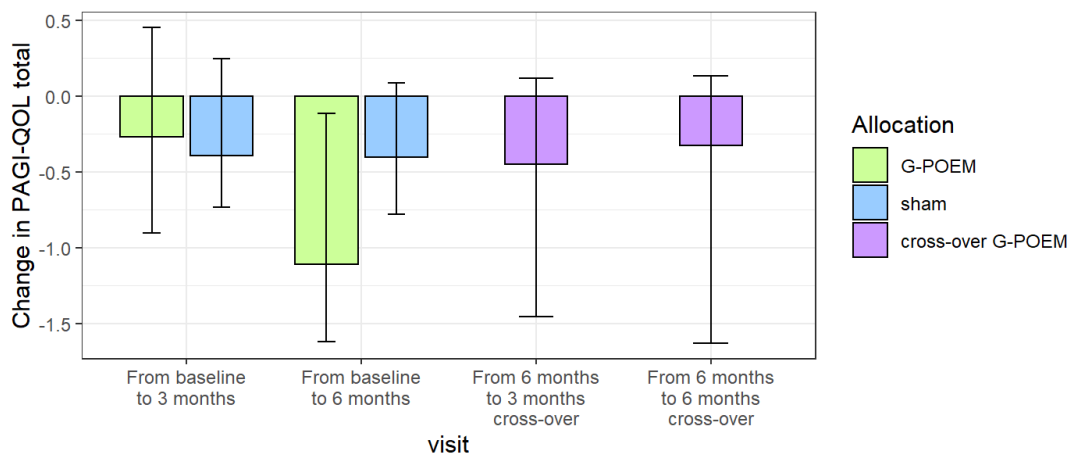

**Suppl Figure S8b. Changes of the PAGI-QoL total score between visits.** Point estimates of medians of differences between the specified visits with 95% confidence intervals calculated on the ITT population are shown for patients after the G-POEM procedure (green, N=21, imputed 1 value (5 %) for 3 months and 1 value (5 %) for 6 months), sham procedure (blue, N=20, imputed 1 baseline value (5 %), 1 value (5 %) for 3 months, and 1 value (5 %) for 6 months), and cross-over G-POEM procedure (purple, N=12) (patients who subsequently underwent the cross-over G-POEM procedure).

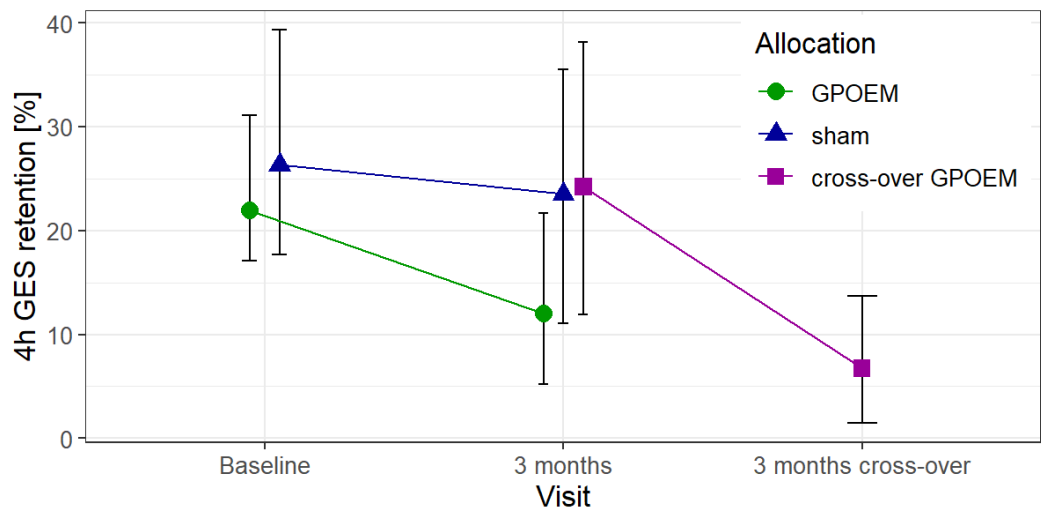

**Suppl Figure S9a. Evolution of the GES 4h retention.** Point estimates of medians with 95% confidence intervals calculated on the ITT population are shown for patients after the G-POEM procedure (green circles, N=21, imputed 2 values (10 %) for 3 months), sham procedure (blue triangles, N=20, imputed 1 value (5 %) for 3 months), and cross-over G-POEM procedure (purple squares, N=12). For the cross-over G-POEM group the value at 3 months reflects only the data for the patients in this group (patients who subsequently underwent the cross-over G-POEM procedure). Points are connected for visual aid.

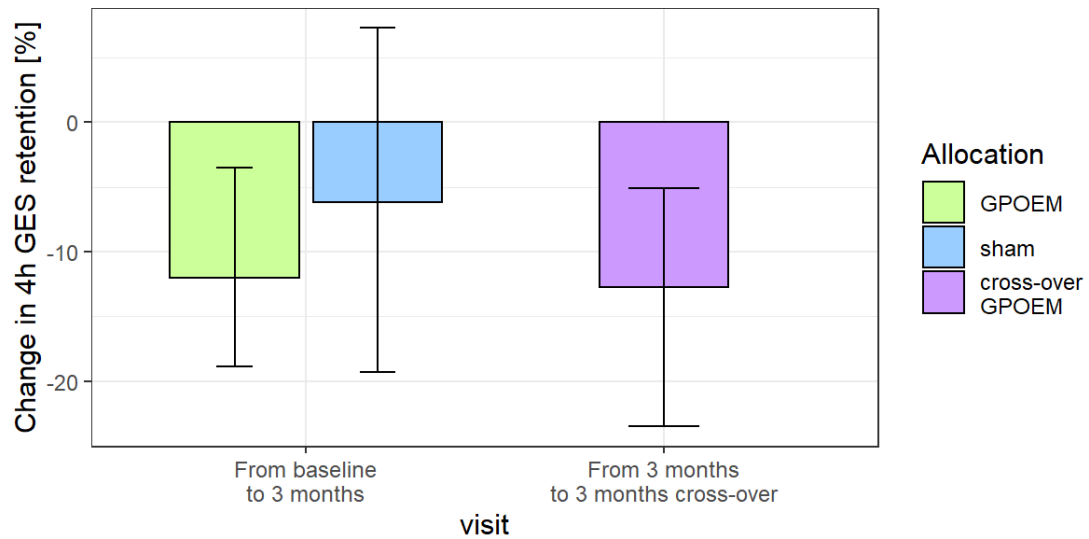

**Suppl Figure S9b. Changes of GES 4h retention between visits.** Point estimates of medians of differences between the specified visits with 95% confidence intervals calculated on the ITT population are shown for patients after the G-POEM procedure (green, N=21, imputed 2 values (10 %) for 3 months), sham procedure (blue, N=20, imputed 1 value (5 %) for 3 months), and cross-over G-POEM procedure (purple, N=12) (patients who subsequently underwent the cross-over G-POEM procedure).

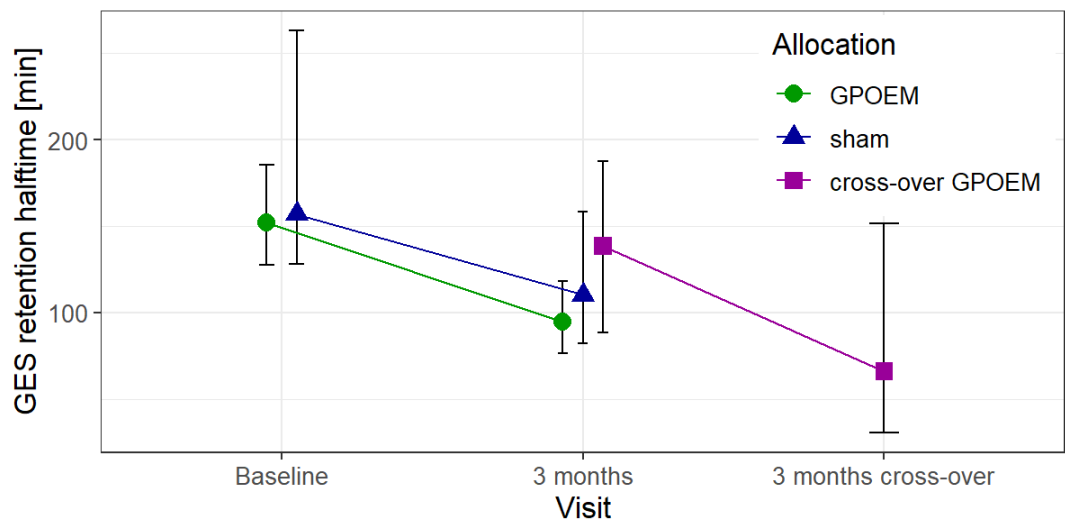

**Suppl Figure S10a. Evolution of GES retention halftime.** Point estimates of medians with 95% confidence intervals calculated on the ITT population are shown for patients after the G-POEM procedure (green circles, N=21, imputed 1 value (5 %) for 3 months), sham procedure (blue triangles, N=20, imputed 1 baseline value (5 %) and 1 value (5 %) for 3 months), and cross-over G-POEM procedure (purple squares, N=12). For the cross-over G-POEM group the value at 3 months reflects only the data for the patients in this group (patients who subsequently underwent the cross-over G-POEM procedure). Points are connected for visual aid.

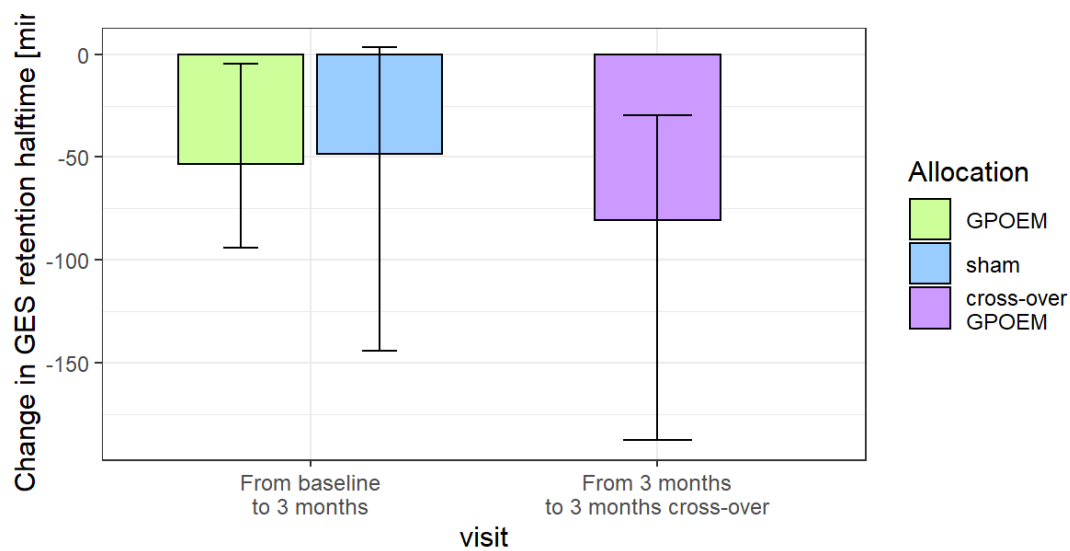

**Suppl Figure S10b. Changes of GES retention halftime between visits.** Point estimates of medians of differences between the specified visits with 95% confidence intervals calculated on the ITT population are shown for patients after the G-POEM procedure (green, N=21, imputed 1 value (5 %) for 3 months ), sham procedure (blue, N=20, imputed 1 baseline value (5 %) and 1 value (5 %) for 3 months), and cross-over G-POEM procedure (purple, N=12) (patients who subsequently underwent the cross-over G-POEM procedure).

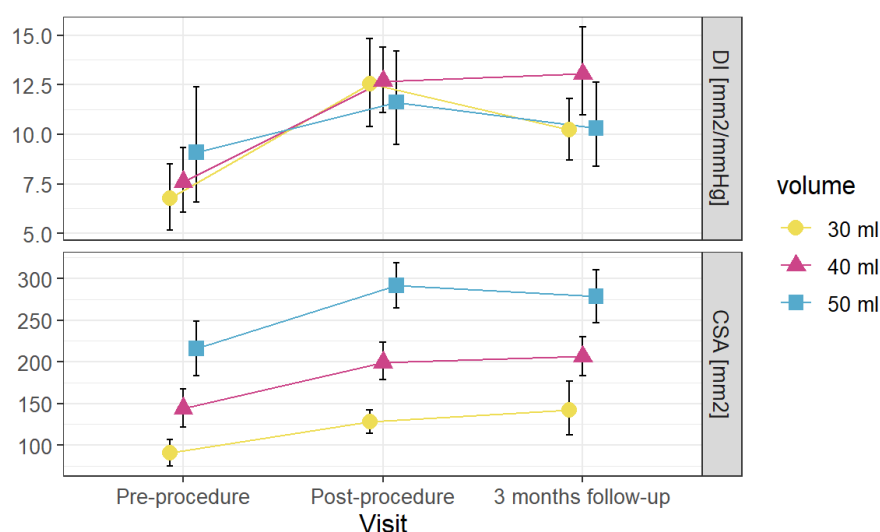

**Suppl Figure S11a. Evolution of pyloric distensibility measurements (Endoflip) for different filling volumes** – primary G-POEM and cross-over G-POEM combined. Point estimates of means for distensibility index (DI, top panel) and cross-sectional area (CSA, bottom panel) with 95% confidence intervals are shown for 30 mL (yellow circles), 40 mL (magenta triangles), and 50 mL (cyan squares) balloon fillings. The figure presents only available data; the imputation model was not used as for pre-procedure, post-procedure, and follow-up time points a total of 16, 17, and 15 (14 for 50 mL) values were available - this measurement was added after beginning of the trial. Points are connected for visual aid.

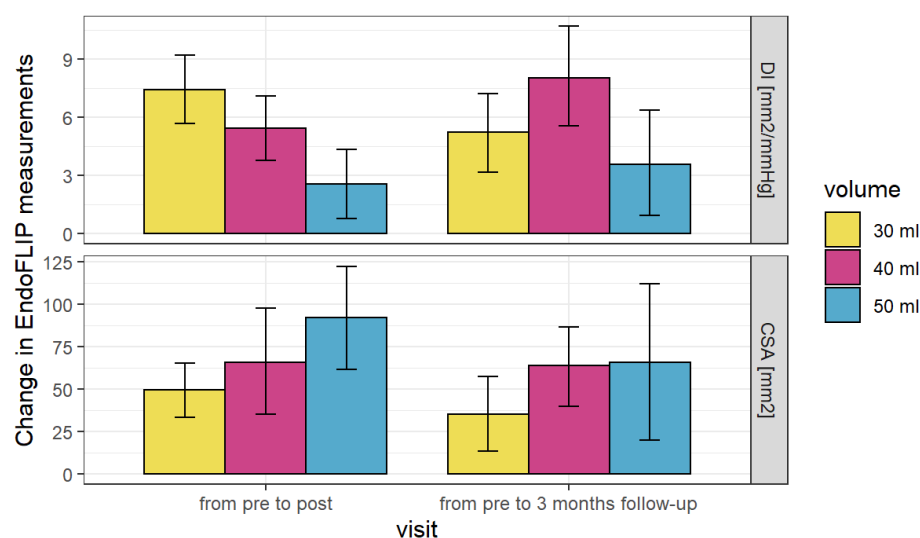

**Suppl Figure S11b. Changes of measurements of pyloric distensibility by Endoflip for different filling volumes between visits** – primary G-POEM and cross-over G-POEM combined. Point estimates of means of differences between the specified visits for distensibility index (DI, top panel) and cross-sectional area (CSA, bottom panel) with 95% confidence intervals are shown for 30 mL (yellow circles), 40 mL (magenta triangles), and 50 mL (cyan squares) balloon fillings. The figure presents only available data; the imputation model was not used as only 14 values were available for pre vs. post treatment difference and 12 for the pre vs. follow-up difference. The measurement of pyloric distensibility was added after beginning of the trial)

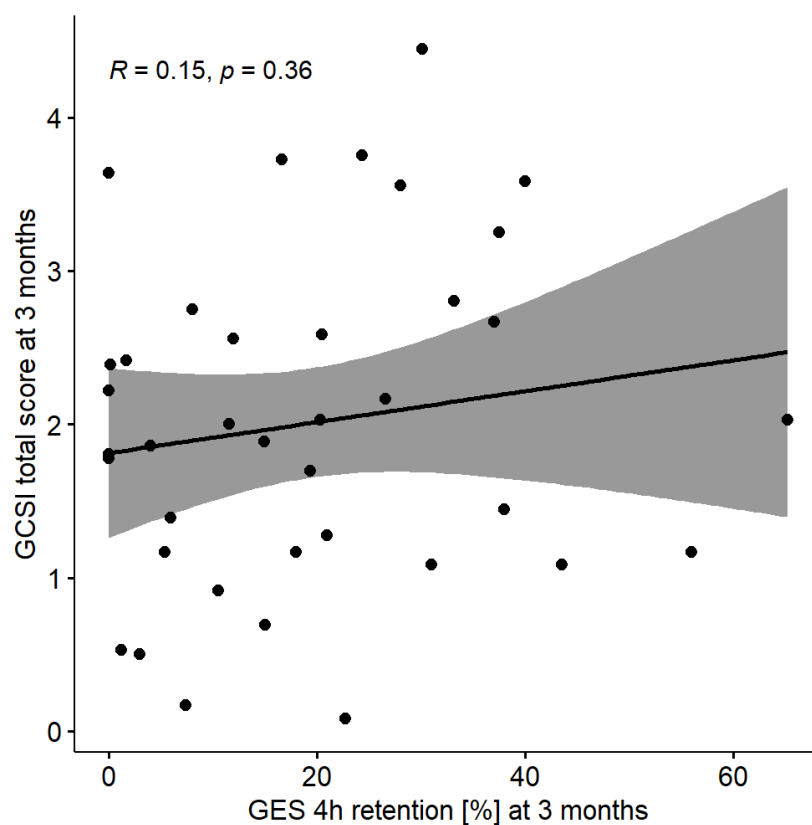

**Suppl Figure S12. Correlation between GCSI total score and GES 4h retention at 3 months.** All points for available data are plotted (no imputation performed) along with the linear regression line (black) and the corresponding confidence interval area (gray). The fact that also a decreasing line can be placed into the gray area indicates that there is no significant correlation. Correlation at 6 months can not be shown as GES was not measured at 6 months.

**SUPPLEMENT****Financial Support**

- a) The trial was financially supported by a Grant 17-28797A from the Czech Ministry of Health
- b) Medtronic provided for free Endoflip balloons for measurement of pyloric distensibility
